# Supplementary material for: Genome-wide Investigation and Expression Profiles of Heat Shock Transcription Factor (HSF) Gene Family in Maize (<em>Zea mays</em> L.) under Different Growth Stages and Abiotic Stress Conditions
Source: Preprints.org preprint supplement (doi:10.20944/preprints202109.0102.v1), 2021-09-06
Supplement: Supplementary file 1 [file supplementary]

## Sheet: Sheet1
Table S2 The protein sequences of Arabidopsis thaliana, Oryza sativa, Brachypodium distachyon, and Sorghum bicolor HSFs.
>AtHSFA1a
MFVNFKYFSFFIRTKMDGVTGGGTNIGEAVTAPPPRNPHPATLLNANSLPPPFLSKTYDMVEDPATDAIVSWSPTNNSFIVWDPPEFSRDLLPKYFKHNNFSSFVRQLNTYGFRKVDPDRWEFANEGFLRGQKHLLKKISRRKSVQGHGSSSSNPQSQQLSQGQGSMAALSSCVEVGKFGLEEEVEQLKRDKNVLMQELVKLRQQQQTTDNKLQVLVKHLQVMEQRQQQIMSFLAKAVQNPTFLSQFIQKQTDSNMHVTEANKKRRLREDSTAATESNSHSHSLEASDGQIVKYQPLRNDSMMWNMMKTDDKYPFLDGFSSPNQVSGVTLQEVLPITSGQSQAYASVPSGQPLSYLPSTSTSLPDTIMPETSQIPQLTRESINDFPTENFMDTEKNVPE…
>AtHSFA1b
MESVPESVPSPNSNTPSIPPPVNSVPPFLSKTYDMVDDPLTNEVVSWSSGNNSFVVWSAPEFSKVLLPKYFKHNNFSSFVRQLNTYGFRKVDPDRWEFANEGFLRGRKQLLKSIVRRKPSHVQQNQQQTQVQSSSVGACVEVGKFGIEEEVERLKRDKNVLMQELVRLRQQQQATENQLQNVGQKVQVMEQRQQQMMSFLAKAVQSPGFLNQLVQQNNNDGNRQIPGSNKKRRLPVDEQENRGDNVANGLNRQIVRYQPSINEAAQNMLRQFLNTSTSPRYESVSNNPDSFLLGDVPSSTSVDNGNPSSRVSGVTLAEFSPNTVQSATNQVPEASLAHHPQAGLVQPNIGQSPAQGAAPADSWSPEFDLVGCETDSGECFDPIMAVLDESEGDAISPEG…
>AtHSFA1d
MDVSKVTTSDGGGDSMETKPSPQPQPAAILSSNAPPPFLSKTYDMVDDHNTDSIVSWSANNNSFIVWKPPEFARDLLPKNFKHNNFSSFVRQLNTYGFRKVDPDRWEFANEGFLRGQKHLLQSITRRKPAHGQGQGHQRSQHSNGQNSSVSACVEVGKFGLEEEVERLKRDKNVLMQELVRLRQQQQSTDNQLQTMVQRLQGMENRQQQLMSFLAKAVQSPHFLSQFLQQQNQQNESNRRISDTSKKRRFKRDGIVRNNDSATPDGQIVKYQPPMHEQAKAMFKQLMKMEPYKTGDDGFLLGNGTSTTEGTEMETSSNQVSGITLKEMPTASEIQSSSPIETTPENVSAASEATENCIPSPDDLTLPDFTHMLPENNSEKPPESFMEPNLGGSSPLLDP…
>AtHSFA1e
MGTVCESVATAKSSTAVMSSIPPFLSKTYDMVDDPLTDDVVSWSSGNNSFVVWNVPEFAKQFLPKYFKHNNFSSFVRQLNTYGFRKVDPDRWEFANEGFLRGQKQILKSIVRRKPAQVQPPQQPQVQHSSVGACVEVGKFGLEEEVERLQRDKNVLMQELVRLRQQQQVTEHHLQNVGQKVHVMEQRQQQMMSFLAKAVQSPGFLNQFSQQSNEANQHISESNKKRRLPVEDQMNSGSHGVNGLSRQIVRYQSSMNDATNTMLQQIQQMSNAPSHESLSSNNGSFLLGDVPNSNISDNGSSSNGSPEVTLADVSSIPAGFYPAMKYHEPCETNQVMETNLPFSQGDLLPPTQGAAASGSSSSDLVGCETDNGECLDPIMAVLDGALELEADTLNELLPE…
>AtHSFA2
MEELKVEMEEETVTFTGSVAASSSVGSSSSPRPMEGLNETGPPPFLTKTYEMVEDPATDTVVSWSNGRNSFVVWDSHKFSTTLLPRYFKHSNFSSFIRQLNTYGFRKIDPDRWEFANEGFLAGQKHLLKNIKRRRNMGLQNVNQQGSGMSCVEVGQYGFDGEVERLKRDHGVLVAEVVRLRQQQHSSKSQVAAMEQRLLVTEKRQQQMMTFLAKALNNPNFVQQFAVMSKEKKSLFGLDVGRKRRLTSTPSLGTMEENLLHDQEFDRMKDDMEMLFAAAIDDEANNSMPTKEEQCLEAMNVMMRDGNLEAALDVKVEDLVGSPLDWDSQDLHDMVDQMGFLGSEP
>AtHSFA3
MSPKKDAVSKPTPISVPVSRRSDIPGSLYVDTDMGFSGSPLPMPLDILQGNPIPPFLSKTFDLVDDPTLDPVISWGLTGASFVVWDPLEFARIILPRNFKHNNFSSFVRQLNTYGFRKIDTDKWEFANEAFLRGKKHLLKNIHRRRSPQSNQTCCSSTSQSQGSPTEVGGEIEKLRKERRALMEEMVELQQQSRGTARHVDTVNQRLKAAEQRQKQLLSFLAKLFQNRGFLERLKNFKGKEKGGALGLEKARKKFIKHHQQPQDSPTGGEVVKYEADDWERLLMYDEETENTKGLGGMTSSDPKGKNLMYPSEEEMSKPDYLMSFPSPEGLIKQEETTWSMGFDTTIPSFSNTDAWGNTMDYNDVSEFGFAAETTSDGLPDVCWEQFAAGITETGFNWP…
>AtHSFA8
MVKSTDGGGGSSSSSSVAPFLRKCYDMVDDSTTDSIISWSPSADNSFVILDTTVFSVQLLPKYFKHSNFSSFIRQLNIYGFRKVDADRWEFANDGFVRGQKDLLKNVIRRKNVQSSEQSKHESTSTTYAQEKSGLWKEVDILKGDKQVLAQELIKVRQYQEVTDTKMLHLEDRVQGMEESQQEMLSFLVMVMKNPSLLVQLLQPKEKNTWRKAGEGAKIVEEVTDEGESNSYGLPLVTYQPPSDNNGTAKSNSNDVNDFLRNADMLKFCLDENHVPLIIPDLYDDGAWEKLLLLSPSRKKTKKQENIVKKGKDDLTLEEEEEDGTMELDKSYMLKLISEEMEKPDDFEFGQLTPERSRNLEILTEQMELLASNE
>AtHSFA9
MTAIPNVVDIESSSSSLCQETATETVTVERGSSDSSSKPDDVVLLIKEEEDDAVNLSLGFWKLHEIGLITPFLRKTFEIVDDKVTDPVVSWSPTRKSFIIWDSYEFSENLLPKYFKHKNFSSFIRQLNSYGFKKVDSDRWEFANEGFQGGKKHLLKNIKRRSKNTKCCNKEASTTTTETEVESLKEEQSPMRLEMLKLKQQQEESQHQMVTVQEKIHGVDTEQQHMLSFFAKLAKDQRFVERLVKKRKMKIQRELEAAEFVKKLKLLQDQETQKNLLDVEREFMAMAATEHNPEPDILVNNQSGNTRCQLNSEDLLVDGGSMDVNGRIEIE
>AtHSFA6b
MDPSFRFIKEEFPAGFSDSPSPPSSSSYLYSSSMAEAAINDPTTLSYPQPLEGLHESGPPPFLTKTYDLVEDSRTNHVVSWSKSNNSFIVWDPQAFSVTLLPRFFKHNNFSSFVRQLNTYGFRKVNPDRWEFANEGFLRGQKHLLKNIRRRKTSNNSNQMQQPQSSEQQSLDNFCIEVGRYGLDGEMDSLRRDKQVLMMELVRLRQQQQSTKMYLTLIEEKLKKTESKQKQMMSFLARAMQNPDFIQQLVEQKEKRKEIEEAISKKRQRPIDQGKRNVEDYGDESGYGNDVAASSSALIGMSQEYTYGNMSEFEMSELDKLAMHIQGLGDNSSAREEVLNVEKGNDEEEVEDQQQGYHKENNEIYGEGFWEDLLNEGQNFDFEGDQENVDVLIQQLGYL…
>AtHSFA7a
MMNPFLPEGCDPPPPPQPMEGLHENAPPPFLTKTFEMVDDPNTDHIVSWNRGGTSFVVWDLHSFSTILLPRHFKHSNFSSFIRQLNTYGFRKIEAERWEFANEEFLLGQRQLLKNIKRRNPFTPSSSPSHDACNELRREKQVLMMEIVSLRQQQQTTKSYIKAMEQRIEGTERKQRQMMSFLARAMQSPSFLHQLLKQRDKKIKELEDNESAKRKRGSSSMSELEVLALEMQGHGKQRNMLEEEDHQLVVERELDDGFWEELLSDESLASTS
>AtHSFA5
MNGALGNSSASVSGGEGAGGPAPFLVKTYEMVDDSSTDQIVSWSANNNSFIVWNHAEFSRLLLPTYFKHNNFSSFIRQLNTYGFRKIDPERWEFLNDDFIKDQKHLLKNIHRRKPIHSHSHPPASSTDQERAVLQEQMDKLSREKAAIEAKLLKFKQQKVVAKHQFEEMTEHVDDMENRQKKLLNFLETAIRNPTFVKNFGKKVEQLDISAYNKKRRLPEVEQSKPPSEDSHLDNSSGSSRRESGNIFHQNFSNKLRLELSPADSDMNMVSHSIQSSNEEGASPKGILSGGDPNTTLTKREGLPFAPEALELADTGTCPRRLLLNDNTRVETLQQRLTSSEETDGSFSCHLNLTLASAPLPDKTASQIAKTTLKSQELNFNSIETSASEKNRGRQEIAV…
>AtHSFA4a
MDENNHGVSSSSLPPFLTKTYEMVDDSSSDSIVSWSQSNKSFIVWNPPEFSRDLLPRFFKHNNFSSFIRQLNTYGFRKADPEQWEFANDDFVRGQPHLMKNIHRRKPVHSHSLPNLQAQLNPLTDSERVRMNNQIERLTKEKEGLLEELHKQDEEREVFEMQVKELKERLQHMEKRQKTMVSFVSQVLEKPGLALNLSPCVPETNERKRRFPRIEFFPDEPMLEENKTCVVVREEGSTSPSSHTREHQVEQLESSIAIWENLVSDSCESMLQSRSMMTLDVDESSTFPESPPLSCIQLSVDSRLKSPPSPRIIDMNCEPDGSKEQNTVAAPPPPPVAGANDGFWQQFFSENPGSTEQREVQLERKDDKDKAGVRTEKCWWNSRNVNAITEQLGHLTSSE…
>AtHSFA4c
MDENNGGSSSLPPFLTKTYEMVDDSSSDSVVAWSENNKSFIVKNPAEFSRDLLPRFFKHKNFSSFIRQLNTYGFRKVDPEKWEFLNDDFVRGRPYLMKNIHRRKPVHSHSLVNLQAQNPLTESERRSMEDQIERLKNEKEGLLAELQNQEQERKEFELQVTTLKDRLQHMEQHQKSIVAYVSQVLGKPGLSLNLENHERRKRRFQENSLPPSSSHIEQVEKLESSLTFWENLVSESCEKSGLQSSSMDHDAAESSLSIGDTRPKSSKIDMNSEPPVTVTAPAPKTGVNDDFWEQCLTENPGSTEQQEVQSERRDVGNDNNGNKIGNQRTYWWNSGNVNNITEKAS
>AtHSFA7b
MDPSSSSRARSMPPPVPMEGLQEAGPSPFLTKTFEMVGDPNTNHIVSWNRGGISFVVWDPHSFSATILPLYFKHNNFSSFVRQLNTYGFRKIEAERWEFMNEGFLMGQRDLLKSIKRRTSSSSPPSLNYSQSQPEAHDPGVELPQLREERHVLMMEISTLRQEEQRARGYVQAMEQRINGAEKKQRHMMSFLRRAVENPSLLQQIFEQKRDREEAAMIDQAGLIKMEEVEHLSELEALALEMQGYGRQRTDGVERELDDGFWEELLMNNENSDEEEANVKQD
>AtHSFA6a
MDYNLPIPLEGLKETPPTAFLTKTYNIVEDSSTNNIVSWSRDNNSFIVWEPETFALICLPRCFKHNNFSSFVRQLNTYGFKKIDTERWEFANEHFLKGERHLLKNIKRRKTSSQTQTQSLEGEIHELRRDRMALEVELVRLRRKQESVKTYLHLMEEKLKVTEVKQEMMMNFLLKKIKKPSFLQSLRKRNLQGIKNREQKQEVISSHGVEDNGKFVKAEPEEYGDDIDDQCGGVFDYGDELHIASMEHQGQGEDEIEMDSEGIWKGFVLSEEEMCDLVEHFI
>AtHSFB1
MTAVTAAQRSVPAPFLSKTYQLVDDHSTDDVVSWNEEGTAFVVWKTAEFAKDLLPQYFKHNNFSSFIRQLNTYGFRKTVPDKWEFANDYFRRGGEDLLTDIRRRKSVIASTAGKCVVVGSPSESNSGGGDDHGSSSTSSPGSSKNPGSVENMVADLSGENEKLKRENNNLSSELAAAKKQRDELVTFLTGHLKVRPEQIDKMIKGGKFKPVESDEESECEGCDGGGGAEEGVGEGLKLFGVWLKGERKKRDRDEKNYVVSGSRMTEIKNVDFHAPLWKSSKVCN
>AtHSFB2a
MNSPPVDAMITGESSSQRSIPTPFLTKTFNLVEDSSIDDVISWNEDGSSFIVWNPTDFAKDLLPKHFKHNNFSSFVRQLNTYGFKKVVPDRWEFSNDFFKRGEKRLLREIQRRKITTTHQTVVAPSSEQRNQTMVVSPSNSGEDNNNNQVMSSSPSSWYCHQTKTTGNGGLSVELLEENEKLRSQNIQLNRELTQMKSICDNIYSLMSNYVGSQPTDRSYSPGGSSSQPMEFLPAKRFSEMEIEEEEEASPRLFGVPIGLKRTRSEGVQVKTTAVVGENSDEETPWLRHYNRTNQRVCN
>AtHSFB2b
MPGEQTGETPTVAGVGGGGAGCSAGNSGGSSGCGAGGGGGGSGGGGGGGGDSQRSIPTPFLTKTYQLVEDPVYDELISWNEDGTTFIVWRPAEFARDLLPKYFKHNNFSSFVRQLNTYGFRKVVPDRWEFSNDCFKRGEKILLRDIQRRKISQPAMAAAAAAAAAAVAASAVTVAAVPVVAHIVSPSNSGEEQVISSNSSPAAAAAAIGGVVGGGSLQRTTSCTTAPELVEENERLRKDNERLRKEMTKLKGLYANIYTLMANFTPGQEDCAHLLPEGKPLDLLPERQEMSEAIMASEIETGIGLKLGEDLTPRLFGVSIGVKRARREEELGAAEEEDDDRREAAAQEGEQSSDVKAEPMEENNSGNHNGSWLELGK
>AtHSFB4
MAMMVENSYGGYGGGGGERIQLMVEGQGKAVPAPFLTKTYQLVDDPATDHVVSWGDDDTTFVVWRPPEFARDLLPNYFKHNNFSSFVRQLNTYGFRKIVPDRWEFANEFFKRGEKHLLCEIHRRKTSQMIPQQHSPFMSHHHAPPQIPFSGGSFFPLPPPRVTTPEEDHYWCDDSPPSRPRVIPQQIDTAAQVTALSEDNERLRRSNTVLMSELAHMKKLYNDIIYFVQNHVKPVAPSNNSSYLSSFLQKQQQQQPPTLDYYNTATVNATNLNALNSSPPTSQSSITVLEDDHTNHHDQSNMRKTKLFGVSLPSSKKRSHHFSDQTSKTRLVLDQSDLALNLMTASTR
>AtHSFB3
MEDAGEHLRCNDNVNDEERLPLEFMIGNSTSTAELQPPPPFLVKTYKVVEDPTTDGVISWNEYGTGFVVWQPAEFARDLLPTLFKHCNFSSFVRQLNTYGFRKVTTIRWEFSNEMFRKGQRELMSNIRRRKSQHWSHNKSNHQVVPTTTMVNQEGHQRIGIDHHHEDQQSSATSSSFVYTALLDENKCLKNENELLSCELGKTKKKCKQLMELVERYRGEDEDATDESDDEEDEGLKLFGVKLE
>AtHSFC1
MEDDNSNNNNNNNVIAPFIVKTYQMVNDPSTDWLITWGPAHNSFIVVDPLDFSQRILPAYFKHNNFSSFVRQLNTYGFRKVDPDRWEFANEHFLRGQKHLLNNIARRKHARGMYGQDLEDGEIVREIERLKEEQRELEAEIQRMNRRIEATEKRPEQMMAFLYKVVEDPDLLPRMMLEKERTKQQQQVSDKKKRRVTMSTVKSEEEEVEEDEGRVFRVMSSSTPSPSSTENLYRNHSPDGWIVPMTQGQFGSYETGLVAKSMLSNSTSSTSSSLTSTFSLPESVNGGGGGGCGSIQGERRYKETATFGGVVESNPPTTPPYPFSLFRGGF
>ZmHSF-01
MDLMLPVTVKEEWPPEEEEEEDVDADADAPRPMEGLHEVGPPPFLTKTFDLVADPATDEVISWGRAGNSFVVWDPHVFAAVLLPRFFKHNNFSSFVRQLNTYGFRKIDPDSWEFANEGFLRGQRHLLRLIKRRRPAPPPPYLQASQSQGSCLEVGRFGGLDGEMERLRRDKSILLAEVVKLRQEQQSTRAGMRAMEERLRHAEHKQVQMMGFLARAVQSPDLFQLLAQQQARRRELEGAALLSAASRKRRRPIGAAPANGGLQQQEEEQQQGDDDDPTATRALFAELDERGTTSELENLALNIQGLGKRRQDGSEKQGGRARSQQQGGFETAELTDDFWEELLNEGMKGGAEAETLPPERRRPAWYVDALAQKLSSMSNNTTAK
>ZmHSF-02
MGFTKRSPQHPASPAGGEVGAQTAGKVTPVPAAPESAPAAVVPRPPDVAPFLTKVYDMVSDPATDAVISWSAAGGSFVIWDSHAFERDLLPRHFKHNHFTSFIRQLNTYGFHKVDPDRWEWANEGFVKGQKHLLKTIKRKKKSSQDVPSDLQSVPVKTAPGTENIEIGKYGGLEKEVETLKRDKALLMQQLVDLRQYQQSSSAEVQNLIQRLRVMEQNQQQMMALLAIVVQNPDFLNQLVQQQRRSNWWNDDGNRKRRFQALEHGPVDDQETSGGGAQIIQYRPPVPETSNQPIPANEAFYSTPAQPASSPALEMPMDVEMASNNVNTFDSTGNDFTDTSALCEWDDMDIFGDELEHILQQPEQDFQVDPPLTVEDYGYDHPRLEQDCQMEAQQNCKNP…
>ZmHSF-03
MLRDRKLPESTSTTFLSLSHSSCATVHPSPIRGAAMVAEQATTTVAVGEPPTATPQPAAAAAAGQRSVPTPFLTKTYQLVDDPAVDDVISWNDDGSAFIVWRPAEFARDLLPKYFKHNNFSSFVRQLNTYGFRKIVPDRWEFANDCFRRGQKRLLCDIHRRKVTLPVAAATRAVTVVATIPMALPVDSPVYSGEEQVLSSSSSPEPPSLLQQQPTPSASGSGDMGEENERLRRENAWLARELGQMKKLCNNILLLMSKYAATKQPDAAKAAAAGNCSGGESSGAAAAPPLPSILELLPSCRRDPASAAVDAAAAAAGTEHEVDEKAGARLFGVSIGRKRMRDESSGHGGGGEDPVGRSAEVKAEPVDARLDHQHSATEPQSWPIYRPRPVYHPLRACSG…
>ZmHSF-04
MDKPVAPGIIKEELLEQQPPTQDGVGGGGDAPRPMEGLHEVGPPPFLTKTFDLVEDPATDAVLSWSRAGNSFIVWDPHVFAYGLLPRLFKHSNFSSFVRQLNTYGFRKVDPDRWEFANEGFLRGQRHLLKMIKRRKPPSAVAPLRQQRAPASCLEVGEFGFEEEIDRLKRDKNILITEVVKLRQEQQSTKDHVRAMEERLRVAEQKQVQMMGFLARAMRNPEFFQQLAQQQDKRKELEDTISKKRRRPIDNTPFYSDGESEQLDSQLKMFESGVLNGLNEPELENLAVNIQELGKGSIDDGNLTQVSDQSELNDDFWAELLVEDFGDKAGQPELEGRTEDVNDLAQQLGYLSSSSPK
>ZmHSF-05
MSHGNGMLNSVKVERWPAAVAANGQPRPMDVLHDGSSPPFLTKTYDMVDDPTTNAVVSWSAANNSFVVWDPHIFGTVLLPRYFKHNNFSSFVRQLNTYGFRKVDPDRWEFANEEFLRGQRHLLKNIRRRKPPHSSPNQQSLGSYLEVGHFGYEEEIDQLKRDKQLLMAEVVKLRQEHQNTRSDLQAMEEKLQDTEQKQQQMMAFMARVMQNPDFMRQLISQREMRKELEDAISKKRRRRIDQGHEAGSMGTGSSLEQGPQGVFEPQEPVESLANGVPSDLESSSVEAKGLEVRQGVSSGGSEHLNGRPSGELNDDFWEDLLHEGGLGADAGNAVGQDDMNMDMDPDVSLPQLKQHGPRH
>ZmHSF-06
MQGGVMAHAAAAAAAASTVTTAVAPPVTAHAVAVAPPVTAHAAAAAGNGSATAAPPPPFLMKTYEVVDDPATDDVISWGPGNNSFIVWNTPEFARDLLPKYFKHSNFSSFVRQLNTYGFRKVDPDRWEFANEGFLRGQKHLLKTINRRKPSLQGNSQPQQPQSQNAPVPSCVEVGKFGLEEEIERLKRDKNVLMQELVRLRQQQQTTDHQLQTLGKRLQGMESRQQQMMSFLAKAMQSPGFLAQFVQQNEKSRRRIVAANKKRRLPRQDGGLDSESAAASLDGQIIKYQPLINEAAKAMLRKILKLDSSHRLESMGNSENGNFLLENYMPGAQAFESSSSTRNSGVTLSEVSANPGLPYGGGGGTSSGLSAICPPEIQCPVVMDNMSSNQVPSMSAVPP…
>ZmHSF-07
MERCGSWDCDAAAAQKAVPAPFLTKTYQLVDDPATDHIVSWGDDRVSTFVVWRPPEFARDILPNYFKHNNFSSFVRQLNTYGFRKVVPERWEFGNEFFRKGEKQLLCEIHRRKTSTSAAPPSPPPFFAAPHFPLFHPDAPHHHHHHQFVGGGDDGAVAAAHVGGVGVALAFPHPHCWREPPHSAAPVATRLLALGAAPPAPSSPLPAADAGGGGRAAVLVEENERLRRSNAALLQELAHMRKLYNDIIYFVQNHVRPAAPSPAAAAFLQGLGLQARKKPAAGPLNHSGGSTTSSSSLTIAEEEPSPPPPPQQADKSAGSSGTARSAADRAPPTMLFGVHLSAARGSKRPASPEEEDDQSPTSPAGKPRLALECAGLSLAVAVPSAGASSPASTS
>ZmHSF-08
MVEEGATAAASRSGPAPFLSKTHQMVEERGTDEVISWAEQGRSFVVWKPVELARDLLPLHFKHCNFSSFVRQLNTYGFRKVVPDRWEFANENFRRGEQGLLSGIRRRKSTTPQPSKYGGGSVVNTAFPPPLPLPPPASVTTSGGGGAGGAGNERSSSSASSPPRTDDLTSENEQLKKDNRTLSTELAQARRHCEELLGFLSRFLDVRQLDLGLLMQEDVRAGAGDDAAPRRAMVSQLERGGEEGKSVKLFGVLLTDAARKRARCEEAAASERPIKMIRIGEPWIGVPSSGPGRCGGGN
>ZmHSF-09
MDGLHTELALGLLECGVVGSGGETAPFVAKTYQMVCDSRTDALVRWGRGNNSFVVADPAGFSRLLLPCFFKHSNFSSFVRQLNTYGFRKVHPDRWEFAHESFLRGQTHLLPRIVRRKKRGGGGGACSSGGDAPQAGCCISTMGEDHRPEADPDEKQEADAEAALLEEVQRLRQEQTAIGEELAQMSRRLQATERRPDQLMSFLDRLAEDPDGVTRNLVEQAAEKKRRRMQLASQSQPARPPLPPAPPPPVLHPLLALGGAAAKGLDGWQWAELQKPSVVLPAFDFDPAASCCGAQHAPNLGGAGIIGMGLTADETTVETPFPFCLLGQGFF
>ZmHSF-10
MLHRRCLQGTTYKKKLQTVLFFFPKNFYNFRSIMALVVCSCLYKMPKPRTPSPRPPHRIATGPPRSQMASSSSCPLAPGTSGCKPRTTRTSGVGFGVEAMARSVAAVKLEPKPEPWAAEAEEGSSVVPRSMEGPPFPAPFVAKTYEMVSDAATDAVVSWAPCGAGNTFVVWDPQALATGILPRFFKHANFASFVRQLNVYGFRKVNPDRWEFANESFLAGQKHLLKSIRRRRASKPQVEASPRNSASACSGQPNKDPGVVESLKRDRAALRAEVITLRQQYSICKSQLVALEERILNNERDQQKAIAFFAKVLSNPAFVQQVLRNYARERELHGASKRQRLMENEGHRQGDLPLRGSTEAAFATGAAGVSVGTGSTNVGTAARQEESGSELNDQEVNSI…
>ZmHSF-11
MAAEHATAAVGEPPPATSQPAEGVTAAAGQRSVPTPFLSKTYQLVDDPAVDDIISWNDDGSAFIVWRPAEFARDLLPKYFKHNNFSSFVRQLNTYGFRKIVPDRWEFANDCFRRGEKRLLCDIHRRKVSPATGAVTVAAAAAAIPMALPVGSPVYSGEEQVLSSSSPEPPSLQQHPPAPSGSGSGGVVSGDVGEENERLRRENARLARELGQMKKLCNNILLLMSKYAATQQPDAAKEAAAGNCTGESSDAAAAPPLPSILELLPSCRADPAPAAAGTDHEDDEKAGARLFGVSIGRKRMRDESDHHAGVCAAEVKAEPVDARPDQQRQRNATEPQSWPIYRPRPVYHPLRACNGSGSAGSDHDGSNDSR
>ZmHSF-12
MHRARPTAHANDPDAPYAAAVAMLLEPKLEDEELPLQQLASPGPFVSLDQLMPAVAVPAEPRPLEALLQGPQLPPFLSKTYDLVNEPALDGVISWGAAGNSFVVWDPSTFARDVLPHNFKHNNFSSFVRQLNTYGFRKVHADRWEFAHEDFLRDSKHLLKRIVRRRSSPTKQSSVQPGSSSGESSLDPELHTLRREKNALLEEVARLKQEHRQTIEQMSTLNHRLESAEDRQRQMVSFLAKLLQNPSFVRKLKLHREKKEIDSTRVKRKFLKHVPHGSVESGESSSQHAGENGSYFAVSSPMATTTSVHDDITELQNFLLEDDDLNFGMDSENTGLEGTEATDDIGELIQGFDTQEELDLGSGAELQEMPPASGPLARDPTIGRFKGKNVLCPGLDATS…
>ZmHSF-13
MDSNRSMATSGVAPFVAKTYRMVDDPATDGVVAWGRDNNSFVVADPFAFSQTLLPAHFKHSNFSSFVRQLNTYGFRKVDPDRWEFAHVSFLRGQTHLLGQIVRRSNGGKRKDDGNGAGSGSADDEDAVAMEVVRLRREQRAIEEQVAAMWRRVQETERRPKQMLAFLVKVAGDPQVLRRLVSGAGGDAVFAAAEPEDGASIKRARLLLDAGSGGDGAVDFSGLYSTTAGSEDDGVGFGSDYLQPPPPYVFPVNSGGY
>ZmHSF-14
MVTNPSPRGRGDSPLHLGVGIHQPSPTRSRQQAAAAARAAAAPVMEVAGAREPGSGGGGGGGGGGPAPFLLKTYEMVDDPSSDAVVSWSDASDGSFVVWNQPEFAARMLPTYFKHNNFSSFIRQLNTYGFRKIDPERWEFANEYFVKGQKHLLKNIHRRKPIHSHSHQPGALPDNERALFEDEIDRLSREKAALQADLWKFNQQQSGAVNQLEDLERRVLDMEQRQTKMLSFLQQARKNPQFVRKLVKMAEESPIFADAFHKKRRLPGLECITDATETATSFFDDHSSSSRQEMGNLLNQHFSDKLKLGLCPAMAESNLITLSTQSSHEDNGSPLGKHPDYERTGMECLPLVPQMMELSDTGTSICPSKSVSFTTAANDDGFLPCHLNLSLASCPMDVV…
>ZmHSF-15
MQGGGVAAAAVPVHAAVGGDGGGAAAAPPPPFLMKTYEMVDDPATDGVVSWGPGNNSFIVWNTPEFARDLLPKYFKHSNFSSFVRQLNTYGFRKVDPDRWEFANEGFLRGQKHLLKTINRRKPSLQGNSQPQQPQLQNAPVPSCVEVGKFGLEEEIERLKRDKNVLMQELVRLRQQQQTTDHQLQTLGKRLQGMESRQQQMMSFLAKAMQSPGFLAQFVQRNENSRRRIVAANKKRRLPKQDGGLESESSAASLDGQIIKYQPSINEAAKAMLRKILNVDSSHRFESMGNSDNSNNNNILLEDYMPAAQAFESSSSTRNSGVTLAEVPANSGLAYVGTSSAICSPPAAPEMQCPVVLDNKAYKQVASMSAVPPVSSDMGIIPEFSDLADLVSVDILGGA…
>ZmHSF-16
MEGSNSNSHGGAGGGGGGSSSPTPFLVKTYEMVEDPATIHVVSWGPGGASFVVWNPPDLSRDLLPKYFKHSNFSSFIRQLNTYGFRKINPERWEFANDDFIRGHKHLLKRIHRRKPVHSHSLRTQASGPLAESQRRELEDEISRLRYEKSLLLADLQRQNQQQRGISWQMQSLESRLAQMEERQRSVVASLCDILQRRGVVRVPASALETTDHSSKKRRVPIPKTDLFVAGEQPKVEEQQVLPFLQAVGAEAPGVSPIRVLDAEPFQKMELALVSLEDFFQRAAPPAPALEMCTGAAAAAAEPSPPLTLGEMLSVPAPVDTNIDLQLQSSACQNPFASTSGRDQMSSPLAEPPSYAQSPMLLPMAQLHGYDYRAAQVDMCSDTTTGDTSQDETTSETGG…
>ZmHSF-17
MDSTLNQVKEESHGEGGDLMAGTVEAADGPSAAVAAAPKPMEGLHDPGPPPFLTKTYDMVDDSDTDLIVSWSATNNSFVVWDPHAFATVLLPRHFKHNNFSSFVRQLNTYGFRKVDPDRWEFANEGFLRGQRHLLKNIRRRKPPAQNATNQQSIGPYLEVGHFGYDAEIDMLKRDKQLLMAEVVKLRQEQQNTKANLKAMEDRLQGTEQKQQQMMAFLARVMRNPEFLKHLVSQNEMRKELQDAISKKRRRRIDQGPEADDLGASSSLEQGSPVLFNAQDPVEFLVDGIPADLESPAFDGHGLIGPHDIDIDIDIGSTSEQQQDMPQEDLNDNFWEQLLNEGLGEENDSPVIEDDMNVLSEKMGYLNSDGPTSSN
>ZmHSF-18
MGEAAAAVAASKRGGGPAPFLTKTHQMVEERGTDEVISWAEQGRSFVVWKPVELARDLLPLHFKHCNFSSFVRQLNTYGFRKVVPDRWEFANDNFRRGEQGLLSGIRRRKSTALQMSKSGSGGSGGVNATFPPPLPPPPPASATTSGVHERSSSSASSPPRAPDLASENEQLKKDNHTLSAELAQARRHCEELLGFLSRFLDVRQLDLRLLMQEDVRAGASDDGAQRRAHAVASQLERGGGEEGKSVKLFGVLLKDAARKRGRCEEAAASERPIKMIRVGEPWVGVPSSGPGRCGGEN
>ZmHSF-19
MAEQGGAAGEAAGSDPPAPAPATAPAPAPALAADAAGQRSLPTPFLTKTYQLVDDPAVDDVISWNEDGSTFVVWRPAEFARDLLPKYFKHNNFSSFVRQLNTYGFRKMVPDRWEFANDFFRRGEKRLLCDIHRRKVAPAPAAGLATAAAAAASGAVTVAAAPIPMALPVRPASPSLSTDEHVLSSNSGSAEDHPQAAASGSVSASASGDTGEENERLRRENARLTRELGQMKKLCNNILLLMTKYASSQQLDASAALSSVVNCSGESSEAVPAPPPLPPAILELMPACPGLATAAAGLVAEADPDQASRLFGVSIGMKRMRDDDDTGEEQADHGAAADVKTEASDPQHRMEPSPESPDQHPWPIYRPTPVYHSMRPCNGPDQGAGSDQDGSNSR
>ZmHSF-20
MEGSNSSSQPPPFLIKTYEMVEDPATNHVVSWGPGGASFVVWNPPDFSRDLLPKYFKHNNFSSFIRQLNTYGFRKIDPERWEFANDDFVRGHTHLLKNIHRRKPVHSHSPQTQVNGPLAESERRELEDEISRLKYEKSLLLTDLQRQSQQRCGISWQMQSLERRLAQMEERQRNIVASLRDILLPVGHGVVSWGSATGADHFSKKRRVPKMDFFVDEPKVEEQQVPFLQTVGAETPGMSPIRLLSAEPFEKMELALVSLESFLQRATAHTSAAQGMLYAAGVAEPSPALALGEMLSAPMDTEIDLQPSACQNPFASTSGQDQSSSPLAEPPSYYAQSPMLPMAQLHEHAHRTAAGVDMNSDTTTGDTSQDDTTSETGGSHVPAKVNDVFWERFLTDAAE…
>ZmHSF-21
MMDGLHTDLALGLLGCGGVGVGSSGRGEQLQTAPFVAKTYQMVCDPRTDALVRWGSENNSFVVVDPAGFSRLLLPCFFKHRNFSSFVRQLNTYGFRKVHPDRWEFAHESFLRGQTHLLPRIVRRKKRGEGACTSSGGDAQAQYAAAAAGCCISMGGEDHRTEGEAEAAVLEEVQRLRQEQTAIGEELAQMSRRLQATERRPDQLMSFLARLAEDPDGVTRHLVEQAAEKKRRRMMQLASQPVRRLPPPPPPPPVLHHPLLALGGAAAAAAKGLDGGCQWAEQKKPSVVLTAAFDHPAASYCGAQHAVPNLGGGNGGGGINGMGLTADETAVETTTTPFPFCLLGQGFF
>ZmHSF-22
MEGASSLPPFLSKTYEMVDDPATDAVVAWTPLGTSFVVANQAEFWRDLLPKYFKHNNFSSFVRQLNTYGFKKIDPEQWEFANDDFIRGQQHRLKNIHRRKPIFSHSSHTQGSGPLPDTERRDYEEEIERLKCDNAALTSELEKNAQKKLVTEKRMQDLEDKLIFLEDRQKNLMAYVRDIVQAPGSFSSFVQQPDHHGKKRRLPVPISLYQDSNAKGNQVVHGSFITNPPACRESFDKTESSLNSLENFLREASEAFNISYDDGLPGPSSAVVITELHSSGESDPHVPSPVSRMHTSSAGAGDSLSSRDLTESTSCAESPRLPQIQPCTDSRTKVSEIDVNREPAVTETGPTRDQPAEEPPHVAAGVNDGFWQQFLTEQPGPDVHQEAQSERRDGDDDKG…
>ZmHSF-23
MERPDVTVKQEEEDEVVVVLDGDGDACGHWPGAGAAPEPWQTPVGSAVPPFLAKTFELVEDPATDAVISWGAARNSFVVWDPHAFAAGHLPRRFKHGNFSTFLRQLNTYGFRKVSPDRWEFAHTDFLAGQRHLLVNIRRRRGGAAGSTASPSSAGAGGDRDSELETLRRDREALARELTRLRREQEEARAQLLDMERRVRGTERRQEQCTAFLARAIRNPAFLDGLLARRCGAHVEAGRKRRLLDAAAAGPDPADVLDIEELAMAAGAEVGVASIPAVAAAQISNTANATDMIWYELLGEEQVEIDAEVHDLVAAAAAATDELAQPWAEMDEKEVAELVRQIDCLASPSP
>ZmHSF-24
MGSKKRSPQHPASPAGGEVGAQAAGKATPVTAAPETAPVAVVPKPPDVAPFLTKVYDMVSDPATDAVISWSAGGGSFVIWDSHVFERDLLPRHFKHNHFTSFIRQLNTYGFHKVDPDRWEWANEGFIKGQKHLLKTIKRKKKSSQDVPSDLQSVPVKTAPGTENIEIGKYGGLEKEVETLKRDKALLMQQLVDLRQYQQTSSLEVQSLIQRLRVMEQNQQQMMALLAIVVHNPDFLNQLVQQQCRSNWWNDDGNRKRRFQALEHGPVDDSETSGGGAQIIQYCPPVPETSNQPTPANEAFCSSPVQSVSSHALEMPMDVEMASNNVGTLDSTGNDFTDTSALCEWDDMDIFGGGLEHILQQTEQDFQVDPLTIEDYGYDRPWLEQDCQVEAQQNCKNPQ…
>ZmHSF-25
MALPAAGTPPFLTKTYAMVEDSATDDTISWNDTGTAFVVWRPAEFARDLLPKHFKHSNFSSFVRQLNTYGFKKVVGDRWEFANDGFRRGEKHLLAGIQRRKGTGAVAAVPVPGIPAGIPLPLSSPPTSSGGEPAVSSSPPRGSTAGVSGAVAELEEENARLRRENARLARELARARRLCDGVRQLMARYDDDQGRGGDEDPADGDEGHGGSGEGPSGPEVKPMLFGVPIGAKRLRGARGDGDDVDDGEDNDEEQDEDDERQTVRKQGVKAARRNEASDLDVLTLSVRAAAAARTGGGSRDRKSPINAHPDRSLSLGLK
>BdHSFA1a
MEGGVVAAAAAAAAAAATVTTAVSPPPAPPAAASNGGGGAAAAAPPPFLMKTYEMVDDPGTDAVVSWGPGNNSFIVWNTPEFARDLLPKYFKHNNFSSFVRQLNTYGFRKVDPDRWEFANEGFLRGQKHLLKTINRRKPLHGNNQMQVQQQQQQQQQPQLQNAPIPACVEVGKFGMEEEIEMLKRDKNVLMQELVRLRQQQQTTDHQLQTLGKRLQGMEQRQQQMMSFLAKAMQSPGFLAQFVQQNENSRRRIVAANKKRRLPKQDDGLDSESASLDGQIIKYQPMINEAATAMLRKILQQDSSHRYESMGNSDNFLLENSMPTAQAFDSSSSTRNSAVTLAEVPGNSSIPYMATSSGLSAICSSSTPAEIQHPVLDNILSKELPNMSSAPSVPTAMAP…
>BdHSFA2a
MMMNPVKVESRASSVAANGAAPRPMDALADAGPTPFLAKTYDMVDDPTTDAVVSWSATNNSFVVWDPRMFGTVLLPRYFKHNNFSSFVRQLNTYGFRKVDPDRWEFASEGFLRGQRHLLKNIKRRKPPQASPNQQSRGSYLEVGHFGYDGEIDRLKRDKQLLMAEVVKLRQEQQNTRAGLHAMEERLQGTEQKQQQMMSFLARVMHNPEFIHQLVSQSEMRKELEDAISNKRRRRIDQGPEAVDSTDTNSSLEQGSQIMFEPPDPVDAFINGSPSDLESSSVETKGAEVQQGAASGSSPPLKGRPSRELNDDFWEDLLHQGGLTGDEAGDPVVPDDMNFFAQKMNFP
>BdHSFA2e
MYPFSGIVKEEEFDFAGAYYAAEDGGSPSSWAAGAGASELPRPMDGLGEAGPTPFLTKTYDVVSDHSTDTVVSWSVAGNSFVVWDAHAFSRVLLPRYFKHGNFSSFVRQLNTYGFRKVDPDRWEFAAEGFLRGQKELLKTIRRRRPLSSSSSAQQQQQQGAAAGCLEVGQFGHEGEVHRLKRDKGVLISEVVKLRQEQQATRAQMQAMEARIVATEQKQQQMTVFLARAMKSPGFLQMLIDRQQGQGPQGHLGPGQAQLRRELEDALSKKRRRPIDYLLPRNGDTSAASYSAAAAAAAARDYVPGLADGHARAEDGRSGGGEDTESFWMELLSLGLEEKQGGGAGGGSGSGEGGGAETDNEVDDEVDVLVQSLYHLSPGGAHNAE
>BdHSFB4b
MAFLVERCGEMVVSMESSAHGGGGGVGGGKAVPAPFLSKTYELVDDPCTDHIVSWGEDEATFVVWRPPEFARDLLPNYFKHNNFSSFVRQLNTYGFRKIVADRWEFANEFFRKGAKHLLAEIHRRKSSQPPPPLPHHHHAYHHLHHHHHHLGTAFSPPPPLAAHHHHPMSSYHFQEDPPAPAIGSNNNGGQGSGGEFLAALSEDNRELRRRNSVLLSELAHMKKLYNDIIYFLQNHVAPVSLPTPQTPSNLISGIVHGGAGAAANTNSSCRLMELDEEGEDETASVKLFGVALKRTKRARRPEERFCDLGSEA
>BdHSFA7b
MEYSAILTDVKQEEPELVVLDDAGDEDDGCLLVPPTPMDLSASAAVAPFLAKTFDMVEDPATDSVVSWGAARNSFVVWDPHAFAARLLPLHFKHANFSSFLRQLNTYGFRKVNPDRWEFANAGFLGGQRHLLAGIRRRRGADRRPACPSSSSAAEVGGVVEGELERLRRDREALARELARLKRQQEESRAALLDMERRVQGTERRQEQCKAFLARAVRNPNFLDNLASRNGIGIAPVEDGCKKKRKMLDAGMTPTPADGITFEEMALAAGVDVIATSQSAVDGGGSGVTTDMVWYELLGEEQTEIDVELDELVAAAAAADAEPWEEIGDEEVQELVHQIDCFAGSPSS
>BdHSFC2a
MSVGGGGAAAAPFVWKTYRMVEDPGTDGVIGWGPANNSFVVADPFVFSQTLLPTHFKHNNFSSFVRQLNTYVSQLLHFLLKSEGFRKVDPDRWEFAHGSFLRGQTHLLRNIVRGGGGGSKRKDAAAADATDQDMTMVATEVVRLKKEQRTIDDRVAAMWRRVQETERRPKQMLAFLLTVVGDRDTLLRLVSGNDGAGDEEPVEGGEKRARLRLDGPEAADFAGFYGVGGDAFVNQLAVDVAAGAGSSVGGAAGSSFGFGGDSGY
>BdHSFA2b
MDPLLSLVKEEQEGHGGGGGSPPAAVAAEDGPSTVAAAAVPRPMEGLHDVGPPPFLTKTYDMVDDQNSNHVVSWSPTNNSFVVWDPHAFATSLLPRHFKHSNFSSFVRQLNTYGFRKVDPDRWEFANEGFLRGQRHLLKNIRRRKPPAHPASNQQSFGSSYLEVGHFGNDAEIDRLKRDKELLMAQVVKLRQEQQDTKARLKAMEDRLHGNEQKQQQMVTFLARVLRNPEFLKQLIAKNEMRKQLHDTISKKRRRRIDQGTEADHMGASSSLQQESPILFDPHVSMELLADGSVQLLADDIPPDLEGSGGFVADGIPPDMESSVEHVADGILPGLEGSVELLADGIPPDLEGSLDLLADGIPLNLEGSMELLADGIPSGLEGPGIKTNGVMEPHGFDLG…
>BdHSFB4d
MAFLVERCSGEMVVSSSSMEHMAAAAKPVPAPFLTKTYQLVDDPCTDHVVSWGEDEATFVVWRPPEFARDLLPNYFKHNNFSSFVRQLNTYGFRKIVADRWEFANEFFRKGAKHLLSEIHRRKSSCSSSQPLPPPPPQPYLSLFSPPPHHHPQLAQGAYHRFQEEEEYSSSPADSGGDLLATLSEDNRQLRRRNSLLLSELAHMRKLYNDIIYFLQNHVEPVPRQQPASCYTRLVELDHAGGPVVVPQAQAQARQRGDDDAAVKLFGVRLDDSKKRRVLLVEEGDHGDHGDEHLEISNEA
>BdHSFA8
MGSKKASPPPSGAASASRAAGLNEASSDVGASTGNGTAPVGAVPKPPDVPPFLTKVYDMVSDPATDKVISWTQAGSSFVISDSHAFERDLLRRHFKHSNFSSFIRQLNTYGFRKVDPDRWEWANEGFLRGQKHLLKTIKRKKRSPQEAGSELEQAPVKTPPGTENIEIGKYGGLVKEVETLKRDKALLMQQLVDLRHYQQSSNLEVQNLVQRLQVMEQNQQQMMALLAIVVQNPSFLNQLVQQQQRRSNWWNADGNKKRRFPALEQGPVTEQETSGGGTEIIQYLPPVPETSGQGIPDEAFCSATAQTTSSPPLDMPMDIDTKTTSDNLDNVGSFGDFLTDTPADWDIELFFDDDGEPLIAPLENNGQVDPPLSVQDYDFPQSEQDCQMEAQA
>BdHSFA6b
MMEHAVLPVPGRVKEEWSPEEEEEAPRPMEGLHETGPPPFLTKTFDLVADPATDGVVSWGRAGNSFVVWDPHVFAAVLLPRSFKHNNFSSFVRQLNTYGFRKIDPDRWEFANEGFIRGQRQLLKMIKRRKPLPYLPSSQQQVLGSCLEVGQFGMDEEIEILKRDKNALLAEVVKLRHDQQSTRADMRAMEERLHLAEQKQLQMMGFLARAMQNPDLFLQLIEQQDKWKDDASLKRRRSIDMAPFLSPREATQNEQHKSTILSEPREFAVPNQPGFSELENLALSIQGIGKGTKDDKGCQNQVSGEVELTDDFWEELLSEGMKDESGMPEPETRRPRYVDA
>BdHSFA4d
MESCQSSQGGGGGPPPFLIKTYEMVEDPATNRVVSWGPGGASFVVWDPPEFSRDMLPKYFKHNNFSSFIRQLNTYGFRKIDPERWEFGNEDFVRGHMHLLKNIHRRKPVHSHSLQNQANGPLAEAERRDLEDEISRLKHEKSVLLADLQRQAQQQCGINWHMQSLEDRLVVMEQRQENVVAYLGDILQRRRGTVSGSVLLETDHFSKKRRVPRIDFFAQEPAVEEQRVPYLPAMVAETPGVLPPVSGANAEPFEKMELALVSLEKLFQRAGNYAPYEDVYNAAAAPSSALALGNLQAAPMEGSINLQPSAELAEPPGYSQSPVLPSAYIHEDMGKTITGVDMNSEASTSGTSQDETDCRNQSFP
>BdHSFA7a
MASSSRCALFVGSKRTRTSGGAGGAGGEEAMAWGSAVVKREVKPEEQEEEEAREARAAWPRPIEGLGEPGPAPFVGKTYEMVADAATDAVVSWAGRGSSFVVWDPLALAAAVLPRFFKHANFASFVRQLNTYGFRKVNQERWEFANEDFLAGQKHLLKNIRRRRASRHHMKSQLRNGSSVCYRQPESLSEVENLKRDHTALRAEAVKLKQQYSICKSQLLAMEQRVLSNERKQQQIITFFVKSLSNPVFLQQIWLNYGNKKELGSTVKRQRLMENEEQHVVDALLKKGTDAAFEKEVSISAGSSDCGTVENDEPMRKWNDQNIGDMCDDVWEELDAIPGIEMKQEGKADIGFDVEEFTGRPCSWVDDCPYLVEPLQFVEH
>BdHSFC1a
MDGLHTELALGLIGQLQTAPFVAKTYQMVCEPRTDALIRWGGENNSFVVADVAGFSQLLLPCFFKHGNFSSFVRQLNTYGFRKVHPDRWEFAHESFLRGQTHLLPRIVRRKKRGEGGGSASCSSATIDSGHEPQHVASASSTGDELDLDDDEEEEGSEAVLLEEVQRLRREQTAIGEQLARMSRRLQATERRPDQLMSFLTRLADEDSSVQLLEQAAAEKKRQRMQQMQMQFTPSRDFAAPSSPSPIALRPPPPRPPAVIDDAAMVDGVWRWAEEQKPARRSITTSEQPAASSGAQQVPEFEGGGGSGVGVGLTDDGGAAAETPFPFCLLGQCFF
>BdHSFC1b
MGSECKGHHQVQDDEAGGPGAIAPFVAKTFHMVSDPATDGVVRWGGASNTFLVLDPAAFSDLLLPSYFKHRNFASFVRQLNTYGFRKVDPDSWEFAHESFLRGQAKLLPLIVRKKKKAGARGELCEEEEEVRGTIRAVQRLRDERKGMEEELQAMDRRLRAAENRPGQMMAFLGKLADDPGVVLRAMVAKKEELSAAAGGGKDSSSPQKRRRIIGAEAGRGGAVSAADAAESRAVPFPFSALGQVFY
>BdHSFA4a
MDPGGGAASLPPFLTKTYEMVDEPATDAVVSWTPSGTSFVVASQADFCRDLLPKYFKHNNFSSFVRQLNTYGFRKVDPEQWEFANEEFIRGQRHRLKNIHRRKPIFSHSSHTQGAGPLVDSERRDYEEEIERLKCDNAALTSELEKNAEKKIDMEKRMQALEDKLFAVEDQQTNLICYVRDIVKEPGFLSSFVQQSDHSRKKRRLPKPISFHEDTSTQGNQIMHRDLTNSPAHELSRESFDKMESSLNSLENFLREATEAFGNGISYDCDIPGPSAVVLTELHLSGESDPHAPSPPSMMHTSSAGVGDSHSSRGIAESTSCTESPPLPQTHSRADSRAKVSEIDVNLEPAVTETGPSRDQPGQDPPATAAAGANDGFWQQFLTEQPGSSVAHQEAQSER…
>BdHSFC2b
MMTGGGGGGEAAGVAPFVAKTYGMVEDPATNGVIAWGSGSNSFVVIDPFVFSQTLLPTHFKHSNFSSFVRQLNTYGFRKVDPDKWEFAHVSFLRGQTHLLRQIVRRSSSSGKRKDDGGCAGASGADDHDDDSTTMVAMEVMRLKQEQKAIEDRVAAMWRRVQETERRPKQMLAFLLKVVGDPQVLRRLVANTSSSNSNSSSGGSDRSEVAFHGGGGPAEGAEVKRPRLLLERDHQHGGKMSSSPAADGVGIGIGSGVGVRRDGFYGVSEETFAPEHSVDFTGFYTGGDGFGDGQVDAGGGGGDLPYAFPVDSGY
>BdHSFA6a
MDPVAGGIVKEELLEQDGGVGAAGLPRPMEGLHEAGPPPFLTKTYDLVGDPSTDQVVSWSPAGNSFVVWDPHVFADVLLPRLFKHSNFSSFVRQLNTYGFRKVDPDRWEFANEGFLRGQRHLLKMIKRRKPPSNLPPSQQQALASCLEVGEFGHEEEIDRLKRDKNILITEVVKLRQEQQTTKGHVQAMEERLRTAEQKQAQMMGFLARAMRNPRFFQQLVQQQDKRKELEDAISKKRRRPVDHVPFYGPGIASQNEQLDSQFLFDSGVLGELSEPGMPGLENLAHNIQELGKSTADEENRDQASGLGELNNEFWAELFDDDYRDGSGQSELEGRRPEDIDELAQQLGYLSSTSPR
>BdHSFB2b
MAAASSSAGQRGAAPTPFLAKTYQLVDDPAVDDVISWGEGGATFVVWRPAEFARDILPSCFKHNNFSSFVRQLNTYGFRKVVPDRWEFANDLFRRGEKRLLCEIHRRKVTPPTSAVTVSPAAAAIPMALPVATATTSPVLSAEEQVLSSSSSSERELPSAFPPPSCSGSGSGVGGDLGDENQRLRRENARLARELGHMKKLCNNIFALMSKYASAPLDAPAPASAGGGNCSGESPLPPPPPPTPPSLELLLSSSSPGPPADADEEKKMSAMLFGVCIGRKRMRNDDGHGVGGAAEVKPEPMDGRPSPPPPPMEPQGWPVYRPRPVYRQHLLHACCSDGHAGSNSK
>BdHSFA5
MEASSGAGARGGGGGGGPAPFLLKTYEMVDDPSTDAVVSWSDASDASFVVWNSPEFAARLLPTYFKHSNFSSFIRQLNTYGFRKIEPERWEFANEYFVKGQKHLLKNIYRRKPIHSHSHQPGALPDNERALFDDEIDRLAREKAALQADLWKFKQQQSGTMFQIEDLEQRVLNMEQRQGKMIAFLQQASKNPQFVNKLVMMAESSSIFTDAFHKKRRLAGLDYATETAEATSFYDEHSTTSKQEMGNLLNQHFSDKLKLGLCPAIAESNLITLSTQSSHEDNGSPHGNHPVCDRMGMECLPLVPQMMELSDTGTSICPSKNSCFTPSVNDEGLLPCHLSLTLASCSMDVDRSQACNADGSTTIDEGRDDPAEATTATTDDNQKTPVDSDKADAATQRRG…
>BdHSFA3
MDHANNNNPATSSMDAALLLLEPKLEMEPPLHLPPPPTANHHHHLIPPPPLAVPSEPPRPLEALLQGPQLPPFLSKTYDLVSEPLLDGVISWGHAGNSFVVWDPSTFARDVLPHNFKHNNFSSFVRQLNTYGFRKVHADRWEFAHEGFLRNNKHLLKTIVRRRSSPTQQSSLQSASSIFRKAQPCSSGEPTVDPELHILKREKKALLQEVARLKQEHRQTIAHMSTLNQRLESAEDRQKQVVSFLAKLLRNPAFLRQLTMLREHKEIESSRVKRKFLKHAPHGSTDSDLQSFLLEDTDLSDGMLPGNFGLDGVEAPGDVGALVQAFNTQQDGLDFGTGAELLGTASGAAHCQDPTIGRSKGKNVLCPGLDGATSSEAECLVSLPDNMGMIPGTVLETAG…
>BdHSFB4c
MERCGSWSDCDAAAAQAAAQKAVPAPFLTKTYQLVDDPATDHIVSWGDDRVSTFVVWRPPEFARDILPNYFKHNNFSSFVRQLNTYGFRKVVPERWEFANEFFRKGEKQLLCEIHRRKTSGSTTSPSPPPFFAPPHFPLFHHPGVSVAQHHHQQFVGDDGVIAAAAHGMGVLPFMQPHWQQREQSQSAAPVATRLLALGPSSEGGSRAANNAAAAGALMAENERLRRSNAALLQELSHMRKLYNDIIYFVQNHVRPVAPSPAAATFLQGLGLQAPARKKQPATAAAGNGLNTSGGSTTSSSSLTIADELSPPPPHHLAAEKSGGEGAGSSSAARSSAAAPTKLFGVHLSATPFGAGSKRPPSPEAELPSTPPATKPRLLLECDDLSLSVAQPCAATSSP…
>BdHSFB1
MAGAAAAQQKRGGGGRGSAGSGGGGPAPFLTKTHQMVEERGTDEVISWGEEGRSFVVWKPVELARDLLPLHFKHCNFSSFVRQLNTYGFRKVVPDRWEFANENFRRGEQSLLSGIRRRKAAATTTTPQSSKSCGSGGGVNVAFPPPLPHTLPPASASTSGNDHSSSSGASSPSRHPDLASDNQRLRKANHTLALELALARRRCEELLGFLSRFLDVRQLDLRLLMHDEDMMQGAVARERCQERQAGCEEKTVKLFGVLLKDAPARKRARCDEAAASERASIKMIRMGEPWVGVPVPPAGPAR
>BdHSFB2c
MAEQQSAAIAAAAEGAGGEPPVPVPAALVAPADAAGQRSLPTPFLTKTYQLVEDPAVDDVISWNEDGSTFVVWRPAEFARDLLPKYFKHNNFSSFVRQLNTYGFRKIVPDRWEFANDCFRRGEKRLLCDIHRRKVVQSSAGLAAAAAAAAAGAVTVATAAIPMALPVTRSGSPEPHSSEEQVLSSNSGSAEERLPGPSGSGSGLGGGAGGGSSSGDLGEENDRLRRDNTRLTRELGQMKKLCNNIVLLMSKYAATQQPDGPASLSSVVNCSGESALAPPPPLPTAILDLMPSCSALATAAGLAVDGEPDTSARLFGVSIGQKRSRDSDDGGGREEDPRDDGGEGADVKPEQADRRPDSQERSPDGPDQHSWPIYRPKPVYRACNGPDGAGSDQDRSNSR
>BdHSFB2a
MASPAAGTAPFLTKTYAIVDDPETDDIISWNDSGTTFVVWRRSDFERDLLPKNFKHSNFASFVRQLNTYGFKKVGVDRWEFANECFRKGEKHLLGGIQRRKGSGGAGAPASAVIPTAIALPISPTATSSGGDPPVSSSSPPRPGSGSAVSGAVAELEEEISRLRRENARLSRELARARRAFDDVRRVVTRYDHGGEEEDERPGAAGGGGKPMLFGVAIGSKRSREVDGDEEDGAEEDGGDEDEEEEDDDDERHAARRDKARRTELSDLNVLALSVRAAAAARAPDVGSRGTKNHSVSLPLGSNRATL
>SbHSFA1a
MQGGVVAHAAAAAAAASTVTTAVAPPVPAHAAVVGNGGGPAAAAPPPPFLMKTYEMVDDPATDDVVSWGPGNNSFIVWNTPEFARDLLPKYFKHSNFSSFVRQLNTYGFRKVDPDRWEFANEGFLRGQKHLLKTINRRKPSLQGNSQPQQPQLQNAPVPSCVEVGKFGLEEEIERLKRDKNVLMQELVRLRQQQQTTDHQLQTLGKRLQGMESRQQQMMSFLAKAMQSPGFLAQFVQQNENSRRRIVAANKKRRLPKQDGGLDSESAAASLDGQIIKYQPLINEAAKAMLRKILKLDSSHRFESMGNSDNNNFLLENYMPAAQAFESSSSTRNSGVTLAEVPANSGLPYVSASSGLSAICSPSVAPEIQCPVVLDNKLSNQVPNMSAVPPVSNPITAGS…
>SbHSFA2a
MNHGNGMLNSVKVESRPSVVATNGQPRPMDVLHDGGPPPFLTKTYDMVDDPTTDAVVSWSATSNSFIVWDPHIFGTVLLPRYFKHNNFSSFVRQLNTYGFRKVDPDRWEFANEEFLRGQRHLLKNIRRRKPPHSSPNQQSLGSYLEVGHFGYEEEIDQLKRDKQLLMTEVVKLRQEQQNTKSDLQAMEEKLQDTEQKQQQMMAFMARVMQNPDFMRQLISQREMRKELEDAISKKRRRRIVQGPEADSMGTGSSLEQGSQVVFEPLEPVESLANGVPSDLGSSSVEAKGFEVQQGVSSCGSERLNGKPTAELNDDFWEDLLHEGGLGAGNAVGQDDMKM
>SbHSFA2e
MDPFHGGIVKEEEFDFDFDFTGVSAGDAAVAAAASSWAVALPELPRPMEGLGEVGPTPFLTKTYDVVDDPNTDTVVSWGFAGNSFVVWDANAFATVILPRYFKHSNFSSFVRQLNTYGFRKVDPDRWEFANEGFQRGQKELLRTIKRRRPPSSPSAQQGQAPSSCLEMGRFGLDGEVHRLQRDKRILLAEVVKLRQEQQATRAQMQAMEERITTAEQKQLQMTVFLARALKNPSFIRMLVDRQGLGGRRRELEDALSKKRRRPIEYHLPPDGESSGTATEAAVNDYICGLPVGVNGVAEADDDGSRLEGSGGGGDTESFWVELLSLGLEEKHLEGGGGSEEGSGADVDDDVDVLVQSIYHLNPNPGSPSGK
>SbHSFA6a
MDPSVAPGIVKEELLEQQQPLQDGVGDGGGAPRPMEGLHEVGPPPFLTKTFDLVEDPATDAVVSWSRAGNSFVVWDPHVFADTMLPRLFKHSNFSSFVRQLNTYGFRKVDPDRWEFANEGFLRGQRHLLKMIKRRKPPSAVPPLRQQQAPASCLEVGEFGFEEEIDRLKRDKNILITEVVKLRQEQQTTKDHVRAMEERLRVAEQKQVQMMGFLARAMRNPEFFQQLVQQQDKRKELEDAISKKRRRPIDNTPFYSTGETSQGEQLDSQFMFESDVLNGLSEPGMPELENLAVNIQELGKGSIDGEKVAQASDQSELNDDFWAELLVEDFGDKAGQSELEGRTEDVDDLAQQLGYLSNSSPK
>SbHSFB4d
MAAFLVERPCSGGGGEKKTKTTTTTVVLSMDDMDMSSHAAKPAGPAPFLTKTFQLVDDHRTDHVVSWGEDGATFVVWRPPEFARDLLPNYFKHNNFSSFVRQLNTYGFRKIVADRWEFANEFFRKGAKHLLSEIHRRKSSSSCLQPPQKLQPPLPQHQPYLSLFMPPQPPRHPSCYNVQEEDHGGKDFLATLSEDNRELRRRNSLLLSELAHMRRLYNDIIYFLQNHVEPVVPTPVATTTTASCRLVELGSTDSDTSAPTWRPRGDDEAPVKLFGVRLNDGKKRRAQQVVPLEGKGDGDQGESIGDGDHNGHG
>SbHSFA8
MGSKKRSPQHPASPAGGEVGAQTAGKAVPVTAAPESAPVSVVPKPPDVAPFLTKVYDMVSDPATDAVISWSAAGGSFVIWDSHVFERDLLPRHFKHNHFTSFIRQLNTYGFHKVDPDRWEWANEGFVKGQKHLLKTIKRKKKSSQDVPSDLQSVPVKTAPGTENIEIGKYGGLAKEVETLKRDKALLMQQLVDLRQYQQSSSLEVQNLIQRLRVMEQNQQQMMALLAIVVQNPDFLNQLVQQQRRSNWWNDDGNRKRRFQALEHGPVDDQETSGGGAQIIQYRPPVPETSNQPIPGNEAIYSTPAQPVSSHAQPVSSPAEEMPMDVEMTSNNVDTLDSTGNDFTDTSALCEWDDMDIFGDELEYILQQPEQNFQVDPPLTVEDYGYDRPRLEQDCQMEA…
>SbHSFA6b
MDRMLPGTVTVKEEWPPEEEEEEEVVVEDVDAPRPMEGLHEVGPPPFLTKTFDLVADPATDEVISWGRAGNSFVVWDPHVFAAVLLPRFFKHNNFSSFVRQLNTYGFRKIDPDRWEFANEGFLRGQRHLLRLIKRRRPAPPPPYLQASQSQSQGSCLEVGQFGGLDGEMDRLRRDKSILLAEVVKLRQEQQSTRAGMRAMEERLQHAEHKQVQMMGFLARAMQSPDFFQQLAQQQDRRRELEGALMLSAAASRKRRRPIGTAPALLDGGVQEEEEEEQAADDDPTATQALFAELDERGTTSELENLALNIQGLGSSKRRQGGGGARSQQRAAAVGGGETAELTDDFWEELLNEGMRGGAAAELLPPERRRPGWYVDALAQKLSSMSNTTAK
>SbHSFA2b
MDPMLNPVKEESHGDGGDLLAAGTEETGDGPSAAVAAAPRPMEGLHDPGPPPFLTKTYDMVDDPSTDPVVSWSATNNSFVVWDPHAFATVLLPRHFKHNNFSSFVRQLNTYGFRKVDPDRWEFANEGFLRGQRQLLKNIRRRKPPAQNATNQQSLGPYLEVGHFGFDAEIDRLKRDKQLLMAEVVKLRQEQQNTKANLKAMEDRLQGTEQKQQQMMAFLARVMRNPEFLKHLISQNEMRKELQDAISKKRRRRIDQGPELDDLGAGSSLEQGSPVLFNPQDPVEFLVDGIPTDLESPAFDGQSLIEPQDIDIGSTSEQQQDMPQEDLNDNFWEQLLNEGLGEENGSPVIEDDMNVLSEKMGFLNSDGPTSTI
>SbHSFB4a
MERCGSWDCDAAAAAQAAAQKAVPAPFLTKTYQLVDDPATDHIVSWGDDRVSTFVVWRPPEFARDILPNYFKHNNFSSFVRQLNTYGFRKVVPERWEFANEFFRKGEKQLLCEIHRRKTSTSTASPSPPPFFVPPHHFPLFHPGAPHHHHHHQFDDGVVAAAARAGVGLAFPHHPHWREPHAAAPGPVAATRLLALGAPPPAPSPSPSPSPLPSAADAGGNNAGRAATAAVLMEENERLRRSNTALLQELAHMRKLYNDIIYFVQNHVRPVAPSPAAAAFLQGLGLQAAARKKQPTAAAAPVSAAGLNHNHSGGSTTSSSSLTIAEEPSPPPPPPQQQADKSGGGGEGGSSGTARSATMLFGVHLSAAPSGAGGTKRPASPEETDQPPASPARKPRLAL…
>SbHSFB1
MEEAGVAVVASKQSGGGVRGGGGPAPFLTKTHQMVEERATDEVISWAEQGRSFVVWKPVELARDLLPLHFKHCNFSSFVRQLNTYGFRKVVPDRWEFANDNFRRGEQGLLSGIRRRKPTTPQSSNKSGGSGGVNVAFPPPLPPPPAPPASGTTSGGGGNERSSSSASSPPRADQLTSENEQLKKDNHTLSTELAQARRHCEELLGFLSRFLDVRQLDLGLLMQGEEDVRAAGAAGDGALQAQRRAVVNHQLERGRGGEEGKSVKLFGVLLKDAAARKRGRCEEAVASERPIKMIRVGEPWVGVPSSGPGRCGGEN
>SbHSFB2c
MGVTFRPSRTFLRPPPCYTLPLARREPNPALSPIPAVRATPEPHLTGRDSAAARYLAPGPTIWQAFARCEWFLSQSGSRSGSGFFLVLLLLLPFSPSLSPLSSPSCPPPVGGSIKFPNPQSKLPEGFLIRTFLPTRLALSRIWKLRFRRLRSSRATGAGQMAEQGGAAPGEAVGSDTTAPAPAPAPAPALAADAAGQRSLPTPFLTKTYQLVDDPAVDDVISWNDDGSTFVVWRPAEFARDLLPKYFKHNNFSSFVRQLNTYGFRKMVPDRWEFANDFFRRGEKRLLCDIHRRKVALAPATPVAGLATAAAAAASGAVTVAAAPIPMALPVTRPASPALSTDEQVLSSNSGSAEDHPQAAASGASGGASASGDTGEENERLRRENARLTRELGQMKKLC…
>SbHSFB4b
MAFLVERCGEMVVSMESSHAKPVPAPFLTKTYQLVDDPCTDHIVSWGEDDTTFVVWRPPEFARDLLPNYFKHNNFSSFVRQLNTYGFRKIVADRWEFANEFFRKGAKHLLAEIHRRKSSQPLPTPLPPHQPYHHHHHHLHHHHLNPFSPPPPPPTQTPLSYHRFQEELAATAHSVHAGAGGNNEGSGGGGDFLAALSEDNRQLRRRNTLLLSELAHMKKLYNDIIYFLQNHVAPVTSPSSAAHAPLPPSAGGAASSCRLMELDPADSPSPPRRPEDDDGTVKLFGVALQGKKKKRAHQDDGDDNHEQGSSDV
>SbHSFA7a
MGSSSCPLSGSPGPSGSNSKPRTTARASGVGFGGVAMARSVAVAAVKLEPKPEPWAAGAEEASSVVPRSMEGPPLPAPFVSKTYEMVADAATDAVVSWAPGGAGNSFVVWDPRALAAGILPRFFKHANFASFIRQLNIYGFRKVNPDRWEFANESFLAGQKHLLKNIKRRRASKPQMEAKPRNCAGACLGSPKDPSEVESLKRDRAALRAEVITLRQQYNICKSQLVALEERILNNERNQQRAIAFFAKVLSNPGFVQQVLLNYAKEKELRGASKRQRLMENEEHRHGDLPLRSGTEAAFATVAAGVGVSAGSSHGGTAAKQEPGPELNGQEMDSIWYDVWDELDAIPGAEMDRREADKGVAGFDVEDFSGRPCGWDDDCSYLAEPMQFVEHYD
>SbHSFC1a
MMDGLHTELALGLLAGCGVGGGGGGDQLLQTAAFVAKTYQMVCDPRTDALVRWGRDNNSFVVVDAAGFSRLLLPCFFKHSNFSSFVRQLNTYGFRKVHPDRWEFAHESFLRGQTHLLPRIVRRKKRGEGGGGACSASGGDAQAQSHYAAAAGCCTGTGEDHHHHHQEEEEADPDNEKEAALLEEVQRLRQEQTAIGEELAQMSRRLQATERRPDQLMSFLARLAEDPDGVTRSLVEQAAEKKRCRMQLASQPVRPLPPPLPPAPPPVPVPVPALHHHPLLAALGGGAAKGLDGWQWEWAEQKPSAVVLPTFDPPAATYCGVGVHHVPNLGGGNGGGIIGMGLTAADETAVETTPFPFCLLGQGFF
>SbHSFC1b
MGSECKDHLQLHAAGYGVGVASPQEEEEEEQAGAIAPFVAKTFHMVSDPATDAVVRWGGASNTFLVLDPATFSDYLLPSYFKHRNFASFVRQLNTYGFRKVDTDRWEFAHESFLRGQAHLLPLVVRKKKKKKAAGGCREQLCEEGEEVRGTIRAVQRLRDQQRGMEEELQAMDRRLRAAESRPGQMMAFLAKLADEPGVVLRAMLAKKEELALAGKGSTTPAPGKRRRIGAEAGVGDVADMAQSRGAVPFPFSVLGQVFY
>SbHSFC2a
MDSRSMATSRAGVDAAGGVAPFVAKTYRMVDDPATDAVVAWGRDSNSFVVADPFVFSQTLLPAHFKHSNFSSFVRQLNTYGFRKVDPDRWEFAHVSFLRGQTHLLSQIVRRSSGGGNGGKRNKDDGGGGGGVDEDDAAVAMEVVRLRREQRAIEEQVAAMWRRVQETERRPKQMLAFLVKVAGDPQVLRRLVSGATAAGTDDAAAATEPQDAANVKRARLLLDAGGGGSDGAVDFSGFCSTGDEADVGFTDYLLQPPPYVFPVNSGY
>SbHSFA5
MEVAAARGTGSGGGGGGGGGGGGPAPFLLKTYEMVDDPSSDAVVSWSDASDGSFVVWNPPEFAARMLPTYFKHNNFSSFIRQLNTYGFRKIDPERWEFANEYFVKGQKHLLKNIHRRKPIHSHSHQPGALPDNERALFEDEIDRLSREKAALQADLWKFNQQQSGAVSQIEDLERRVLDMEQRQTKMLSFLQQAQKNPQFVSKLIKMAEASPIFADAFHKKRRLPGFEYITEATETATSFFDDHSSSSRQEMGNLLNQHFSDKLKLGLCPAMTESNLITLSTQSSHEDNGSPHGKHPDYERTAMECLPLVPQMMELSDTGTSICPAKSLSFAAAANDDGFLPCHLNLSLASCSMDVGRSQIPVANGNIVDEKDGPAEMTTPTMEKVGSIPDRCHDADTQ…
>SbHSFA3
MDRARPTAAAAMLLEPKLEDEDVPPLLQQLASPGPPFVSLDQLMPAPAAEPPRPLEALLQGPQLPPFLSKTYDLVSEPALDGVISWGAAGNSFVVWDPSTFARDVLPHNFKHNNFSSFVRQLNTYGFRKVHADRWEFAHEDFLRDSKHLLKRIVRRRSSPTKQSSIQPGSSSGESILDPELHTLRREKNTLLEEVARLKQEHRQTIEHMSTLNHRLESAEDRQRQMVSFLAKLLQNPSFVRQLKLHREKKEIDSTRVKRKFLKHVPHSIESGESSSQHAGESGSHFAVSSSMATSLHDDITELQNFLLEDDDVNFGMGSENMGLEGIDAPEDIGELIQGFDTQEELELGSGAELLEMPPASGPLGQDPTIGRSKGKNVLCPGLDATSSEADCLSPLSDN…
>SbHSFB2a
MASPAAGTPPFLTKTYAMVEDPTTDETISWNDTGTAFVVWRPAEFARDLLPKHFKHSNFSSFVRQLNTYGFKKVVADRWEFANDGFRRGEKHLLGGIQRRKGTGAVAAVPTPGIPTGIPISSPPTSSGGEPAVSSSPPRGSTAGVSGAVAELEEENARLRRENARLARELARARRLCDGVRHLVARYDQGRGGDEDLADGDEGHGGGGERPSGPGVKPMLFGVPIGAKRLRGADGDGDDVDDGEDGAAEENGEGNDEEQDEDEERHAARERGVKAARRNETSDLDVLTLSVRAAAAARTGGGSRDR
>SbHSFB2b
MAAEHAAAAVGEPPPPAATTTQPPAEGVTAAPAAAAGQRSVPTPFLTKTYQLVDDPAVDDVISWNDDGSAFIYFKHNNFSSFVRQLNTYGFRKIVPDRWEFANDCFRRGEKRLLCDIHRRKVTAATGAVTVAAAIPMALPVGSPVYSGEEQVLSSSSSPEPSLQQQPPAPSGSGSGGVPSGDVGEENERLRRENARLARELGQMKKLCNNILLLMSKYAATQQQPDAAAAKQAAAAAGNCSGESAEATAAAPPPPLPSILELLPSCRGDPAPDAAVETAAAVGTEHEVVEKAGARLFGVSIGRKRMRDESNGGVFEDYPASRAAEVKAEPVEAAHPDQRQQENNATEPVPQSWPIYRPRPVYHPLRACNGSGSAGSDHDGSTNSR
>SbHSFA4d
MEGCNSHGGGGGGGGGGGGGGSSSPPPFLIKTYEMVEDPATNHVVSWGPGGASFVVWNPPDFSRDLLPKYFKHNNFSSFIRQLNTYGFRKIDPERWEFANDDFIRGHTHLLKNIHRRKPVHSHSLQTQVNGPLAESERRELEDEINRLKYEKSLLLADLQRQNQQRCGISWQMQSLESRLVAMEERQRHIVASLCDILQRHGVVPGSTTTTLEMETPADHFSKKRRVPKFGFFVDADEPKVEEQQVPSFLQTVGGVVAETPGMSPIRLLNDEPFEKMELALVSLENFFQRATHSPAANDIDMYAGGAAEPPSPALSLGEMFSVSAPMDTSINLQSSARHCQNPFASTSGQDQSSSPLAQAEPPSYDARSPILPLAQLHEYAPRAAEVDMNSDTTTGDTS…
>SbHSFC2b
MAAGAGGGAAAPFVWKTYMMVEDPGTDGVIGWGKGNNSFVVADPFVFSQTLLPAHFKHNNFSSFVRQLNTYGFRKVDPDRWEFAHASFLRGQTHLLRNIVRRGSSGSAGGGGGGGGGKRKDAPASVNPVEPSAEDIAMVATEVVRLKQEQRTIDDRVAAMWRRVQETERRPKQMLAFLLKVVGDRDRLHRLVGDGGTAAAPGPDNNGFASGGAAAAEEGGEKRARLLLDGDNMVALGPEAVDFAGFYSGGGVFGFGDVAVDAAAGSGGGGCSFAFGGGY
>SbHSFA7b
MSSAKTPTEPTHQPTTQRDELIAAPAARPPRLRRMERPAVTVKQEEDDDDVVVVLDADGDAAGGHWPGAAGAAPAPAPEPWQTPAGSAVPPFLAKTFELVEDPATDGVISWGAARNSFVVWDPHAFSAGHLPRRFKHGNFSTFLRQLNTYGFRKVSPDRWEFAHAEFLAGQRPLLVNIQRRRPGSTASTPSSAGAGGGGDRDNSELKRLRRDREALARELTRLRREQEEARAQLLDMERRVRGTERRQEQCTASLARAVRSPAFLDGLLARRGQGGRGGAHVEAAGRKRRLLDAAAAATAPDAADVLAFEELALAAGAEVEAAAQISDAGNATDMMWYELLGEEQVEIDAEVDELVAAAAATEAAAEPWAEMDEKEVEELVAAAATAATEAEPWAEMDD…
>OsHSFA1a
MEAAVAAAAAAAGAVTTAVAPPPGAAVSNGVATAPPPFLMKTYEMVDDPATDAVVSWGPGNNSFVVWNTPEFARDLLPKYFKHSNFSSFVRQLNTYGFRKVDPDRWEFANEGFLRGQKHLLKTINRRKPTHGNNQVQQPQLPAAPVPACVEVGKFGMEEEIEMLKRDKNVLMQELVRLRQQQQTTDHQLQTLGKRLQGMEQRQQQMMSFLAKAMHSPGFLAQFVQQNENSRRRIVASNKKRRLPKQDGSLDSESASLDGQIVKYQPMINEAAKAMLRKILKLDSSHRFESMGNSDNFLLENYMPNGQGLDSSSSTRNSGVTLAEVPANSGLPYVATSSGLSAICSTSTPQIQCPVVLDNGIPKEVPNMSAVPSVPKAVAPGPTDINILEFPDLQDIVAE…
>OsHSFA2a
MNYRVVNPVKVESGPSTGVANGQPPRPMDGLADGGPPPFLTKTYDMVDDPTTDAVVSWSATNNSFVVWDPHLFGNVLLPRYFKHNNFSSFVRQLNTYGFRKVDPDKWEFANEGFLRGQKHLLKSIKRRKPPNSSPSQQSLGSFLEVGHFGYEGEIDQLKRDKHLLMAEVVKLRQEQQNTKSDLQAMEQKLQGTEQKQQHMMAFLSRVMHNPEFIRQLFSQSEMRKELEEFVSKKRRRRIDQGPELDSMGTGSSPEQVSQVMFEPHDPVDSLFNGVPSDLESSSVEANGGKAQQDVASSSSEHGKIKPSNGELNEDFWEDLLHEGGLDEDTRNPAIDDMNLLSQKMGYLNSSSTKSPQ
>OsHSFA2b
MDDPMLNAVKEEESHGDGGGLEVVAGEDGAAAVAAGVAPRPMEGLHDAGPPPFLTKTYDMVDDAGTDAAVSWSATSNSFVVWDPHAFATVLLPRFFKHNNFSSFVRQLNTYGFRKVDPDRWEFANENFLRGQRHLLKNIKRRKPPSHTASNQQSLGPYLEVGHFGYDAEIDRLKRDKQLLMAEVVKLRQEQQNTKANLKAMEDRLQGTEQRQQQMMAFLARVMKNPEFLKQLMSQNEMRKELQDAISKKRRRRIDQGPEVDDVGTSSSIEQESPALFDPQESVEFLIDGIPSDLENSAMDAGGLVEPQDFDVGASEQQQIGPQGELNDNFWEELLNEGLVGEENDNPVVEDDMNVLSEKMGYLNSNGPTAGE
>OsHSFA2e
MNPLRVIVKEEELDFAAAAAAAAAGEGSPSSWAVGVMDLPRPMEGLGEAGPPPFLCKTYEVVDDPGTDTVISWGFAGNSFVVWDANAFAAVLLPRYFKHSNFSSFVRQLNTYGFRKVDPDRWEFANEGFLRGKKELLKTIKRRRPPPSSPPSSSSSSSSSQHQQQPAAACLEVGQFGRDGVVNRLQRDKSVLIAEVVKLRQEQQTTRAQMQAMEERISAAEQKQQQMTVFLARAMKNPGFLQMLVDRQAGQHGARNRVLEDALSKKRRRPIEYLLTRNGETCAAGESAAMLAADGVAEPDGDTTPRGDGGGGGGGDTESFWMQLLSLGLEEKQREDGVAGGVQESNSGGADVDNDEEDDDDDVDVLVQSIYHLSPK
>OsHSFA3
MDHNTDPPPTTMVDAAAALLLEPKLEGYDDDGGGEPLQPAPFVSPLDQLMQPPRPLEALLQGPHLPPFLSKTYDLVCEPELDGVISWGHAGNSFVVWDPSAFARDVLPHHFKHNNFSSFVRQLNTYGFRKVHADRWEFAHEDFLRHSKHLLKKIVRRRSSPTQQSGLQPGSSGESGLDPELNTLRREKSALLQEVTRLKQEHLQTIEQMSTLNQRLESAEDRQKQMVSFLAKLLQNPTFLRQLKMHRQQKEIDSTRVKRKFLKHVPHGNIDSGESSSQHTGESNLDFSPTSLDLPATHSDILDLQNFLLEDGDLNLAMLPENIGLDGIEAPDDIGALVQGFDTQEELELGSGVELLEIPPASGPRGQDPTIGRSKGKNVLSPGLDATSSEADCLGSFSD…
>OsHSFA4a
MEGGGGGGSLPPFLSKTYEMVDDPSTDAVVGWTPAGTSFVVANQPEFCRDLLPKYFKHNNFSSFVRQLNTYGFRKVDPEQWEFANEDFIKGQRHRLKNIHRRKPIFSHSSHSQGAGPLTDNERKDYEEEIERLKSDNAALSSELQNNTLKKLNMEKRMQALEEKLFVVEDQQRSLISYVREIVKAPGFLSSFVQQQDHHRKKRRLPIPISFHEDANTQENQIMPCDLTNSPAQTFYRESFDKMESSLNSLENFLREASEEFGNDISYDDGVPGPSSTVVLTELHSPGESDPRVSSPPTRMRTSSAGAGDSHSSRDVAESTSCAESPPIPQMHSRVDTRAKVSEIDVNSEPAVTETGPSRDQPAEEPPAVTPGANDGFWQQFLTEQPGSSDAHQEAQSER…
>OsHSFA4d
MESSNLGGGGGGGGGGGPPPFLIKTYEMVEDAATNHVVSWGPGGASFVVWNPLDFSRDLLPKYFKHNNFSSFIRQLNTYGFRKIDPERWEFANEDFIRGHTHLLKNIHRRKPVHSHSLQNQINGPLAESERRELEEEINRLKYEKSILVADLQRQNQQQYVINWQMQAMEGRLVAMEQRQKNIVASLCEMLQRRGGAVSSSLLESDHFSKKRRVPKMDLFVDDCAAGEEQKVFQFQGIGTDAPAMPPVLPVTNGEAFDRVELSLVSLEKLFQRANDACTAAEEMYSHGHGGTEPSTAICPEEMNTAPMETGIDLQLPASLHPSSPNTGNAHLHLSTELTESPGFVQSPELPMAEIREDIHVTRYPTQADVNSEIASSTDTSQDGTSETEASHGPTNDVF…
>OsHSFA5
MEVAAGARGGGAGGGGGGPAPFLLKTYEMVDDPSTDAVVSWSDASDASFVVWNHPEFAARLLPAYFKHSNFSSFIRQLNTYGFRKIDPERWEFANEYFIKGQKHLLKNIHRRKPIHSHSHPPGALPDNERAIFEDEIERLSREKSNLQADLWKSKQQQSGTMNQIEDLERRVLGMEQRQTKMIAFLQQASKNPQFVNKLVKMAEASSIFTDAFNKKRRLPGLDYSIENTETTSFYDDHSSTSKQETGNLLNQHFSDKLRLGLCPAMTESNIITLSTQSSNEDNGSPHGKHPECDMMGRECLPLVPQMMELSDTGTSICPSKSSCFAPPISDEGLLTCHLSLTLASCSMDVDKSQGLNANGTTIDNPTEAATATMEKDDTIDRSFDDNQKKSADSRTADA…
>OsHSFA6a
MDPAAAGIVKEEMLESQQQQRQEDGGAAPRPMEGLHEVGPPPFLTKTYDLVEDPATDGVVSWSRAGNSFVVWDPHVFADLLLPRLFKHNNFSSFVRQLNTYGFRKVDPDRWEFANEGFLRGQRHLLKTIKRRKPPSNAPPSQQQSLTSCLEVGEFGFEEEIDRLKRDKNILITEVVKLRQEQQATKDHVKAMEDRLRAAEQKQVQMMGFLARAMRNPEFFQQLAQQKEKRKELEDAISKKRRRPIDNVPFYDPGETSQTEQLDSPYLFDSGVLNELSEPGIPELENLAVNIQDLGKGKVDEERQNQTNGQAELGDDFWAELLVEDFTGKEEQSELDGKIDGIDELAQQLGYLSSTSPK
>OsHSFA6b
MEKMMPGMVKEEWPPSSPEEGEAPRPMEGLHEVGPPPFLTKTFDLVADPATDGVVSWGRAGSSFVVWDPHVFAAVFLPRFFKHNNFSSFVRQLNTYGFRKIDPDRWEFANDGFLRGQRHLLKMIKRRRPLSYLPGSQQALGTCLEVGQFGLDEEIDRLKRDKNILLAEVVKLRHKQQSTKANMRAMEERLQHAEQKQVQMMGFLARAMQNPDFFHQLIHQQDKMKGLEDTFSKKRTRSIDIVPFLNPGEVSQGDQLESTLLFDPRPFAELNDEPAKSELENLALNIQGLGKGKQDVNRTRNQPRNQASNETELTDDFWEELLNEGARDDAGIPGMERRRPRYVDALAQKLGYLSNSSQK
>OsHSFA7a
MLKPQTPRARRAAHPNSHMASSSSSSSLCRLLIPRPTTRRFSGGGGEGGMAAAAPVKREVKPEAGEGWGGGDLGVVPPPPRPMEGLGEAGPAPFVAKTYEMVADAATDAVVSWGPGGSGASFVVWDPHALAAGVLPRFFKHANFSSFVRQLNTYGFRKVTPDRWEFANEAFLAGQKHLLKNIKRRRVSKPLVDSQLRNKASVVFGQPEAPGEVVSLKRDRAALRAEVIMLKQQYNACKSQLIAMEEMVRNIERRQQQTIGFFAKVLTNPAFVQQVLLNYVNKNGLRGAAKRQRLMENEEQHADSPLNKGMEAASVMEADVSPGSTGCGTVGKVETTPMCNFQNIENMCDDVWEELDALPETGMEQEEKAGIGSFDVEEFVGRPCGWVDDCPYLVEPMQF…
>OsHSFA7b
MDYSTVKQEEVEVVVLDGEEEAAAAAAPVPLPAAMGVGAAVAPFLVKTFEMVEDPATDAVVSWGGAARNSFVVWDPHAFAAGLLPLHFKHANFSSFLRQLNTYGFRKVSADRWEFANEDFLGGQRHLLANIRRRRRGAGTGSTTPRAVNCGGGGGEGEVERLRRDKEALARELARLRRQQQEARAQLLDMERRVRGTERRQEQCTEFLARALRSPDVLDNIARRHAAAVERKKRRMLAAAADDDGLTFEALALAAAADTSHSTGGAVTTDMIWYELLGEEQAEIDIEVDQLVASASAAADTASEAEPWEEMGEEEVQELVQQIDCLASPSS
>OsHSFA8
MGSKKRSPQHPAAAAPPPAVGGGGGGEVSGDGGASTANGPVVPKPSEVAPFLTKVYDMVSDPATDNVISWAEGGGSFVIWDSHAFERDLHRHFKHSNFTSFIRQLNTYGFRKVHPDRWEWANEGFIMGQKHLLKTIKRRKKSSQEAPSEIQKAPVKTAPGTENIEIGKYGGLEKEVETLKRDKALLMQQLVDLRHYQQTSNLEVQNLIERLQVMEQNQQQMMALLAIVVQNPSFLNQLVQQQQQQRRSNWWSPDGSKKRRFHALEQGPVTDQETSGRGAHIVEYLPPVPETSGQVNPVEGAICSANSQPVPSPAVATPMDMQTSNVADTLGSSEEPFADNSTLHEWDDNDMQLLFDDNLDPILPPFENDGQMGPPLSVQDYDFPQLEQDCLMEAQYNSN…
>OsHSFB1
MAAAEAAAAVGKQQQKGGGGRGGGGGGPAPFLTKTHQMVEESATDEVISWGKEGRSFVVWKPVEFARDLLPLHFKHCNFSSFVRQLNTYGFRKVVPDRWEFANGNFRRGEQGLLSGIRRRKATTPQSSKSCGSGVNVAFPPPLPPLPPAPSATTSSGNDRSSSSASSPPRADITSENEQLRKDNQTLTTELARARRHCEELLAFLSRFLDVRQLDLRLLMQEDMRAAAGGVGGEQREQEHAREEKCVKLFGVLLDDTHGAATRKRARCEEAAASERPIKMIRIGEPWVSVPSSGPARCGGDN
>OsHSFB2a
MASPAAGTPPFLTKTYAMVEDPSTDETISWNDSGTAFVVWRPAEFARDLLPKHFKHSNFSSFVRQLNTYGFKKVVADRWEFANDCFRRGEKHLLGGIQRRKGSGTGGAGAAPAGGIPTAIPISSPPTSSGGEPAVSSSPPRGAAGIAAGVSGAVAELEEENARLRRENARLARELARARRVCDGVRRLVSRYDHDHGGGEEEAGEGDVKPMLFGVAIGGKRSREENGEDEEEEEEEGADEDGEDDEVEEDDEERERHAARRVPVREGKVRRTTELSDLDVLALSVRAAAAARPGGASRDRKSSVS
>OsHSFB2b
MADQTAAAVVVGGGAAATMGEPSPPPPAPAAEAAGVGVGQQQRTVPTPFLTKTYQLVDDPAVDDVISWNDDGSTFVVWRPAEFARDLLPKYFKHNNFSSFVRQLNTYGFRKIVPDRWEFANDCFRRGERRLLCEIHRRKVTPPAPAATTAAVAAAIPMALPVTTTRDGSPVLSGEEQVISSSSSPEPPLVLPQAPSGSGSGGVASGDVGDENERLRRENAQLARELSQMRKLCNNILLLMSKYASTQQLDAANASSAAGNNNNNNCSGESAEAATPLPLPAVLDLMPSCPGAASAAAPVSDNEEGMMSAKLFGVSIGRKRMRHDGGGDDDHAATVKAEPMDGRPHGKDEQSAETQAWPIYRPRPVYQPIRACNGYEYDRAGSDQDGSNST
>OsHSFB2c
MAEQGAGEADAGGGEPPPAAVMTAAAEALAGQRSLPTPFLTKTYQLVEDPAVDDVISWNEDGSTFVVWRPAEFARDLLPKYFKHNNFSSFVRQLNTYGFRKIVPDRWEFANDCFRRGEKRLLCDIHRRKVVAAAAAAPPPPSPGMATAAAAVASGAVTVAAAPIPMALPVTRAGSPAHSSEEQVLSSNSGSGEEHRQASGSGSAPGGGGGGSASGGDMGEENERLRRENARLTRELGHMKKLCNNILLLMSKYAATQHVEGSAGISSIANCSGESSEAVPPPPPLPPAILDLMPSCPALATAAAAAGLAIDGEPDPSARLFGVSIGLKRTRDDAAAAADEDGGGEDQAEHGGADVKPEAADPHPAGGGGGSSTEASPESHPWPIYRPTPMYHAVRLTCN…
>OsHSFB4a
MEWEEESEAARQKAAAASASVVPAPFLTKTYQLVDDPATDHVVSWEDDDGGESASSFVVWRPPEFARDILPNYFKHSNFSSFVRQLNTYGFRKVVPERWEFANEFFRKGEKQLLCEIHRRKSAAATWPPFPPPPPPFFAPRHFAAGAFFRHGDGMLHGRLGALVTTTERRHWFESAALPVAPSSRLLSQLGPVIAPARRAAATPEEEALMQENHRLLRGNAALVQELAHMRKLYSDIIYFVQNHVRPVAPSPAAAAALHGLGVLRPPPAGGKAPASEVRGASGRSATSSSSLTVAEDQPTLLALRLPRTTEKIINEVSGGNGGGSTKLFGVHLSSADEQTSSGASRKRSPPQEQPPTSPAPKRTLVVEHSELRLSIVSPP
>OsHSFB4b
MAFLVERCGEMVVSMEMGPHGGVGGGGGAAAGKPVPAPFLTKTYQLVDDPCTDHIVSWGEDDTTFVVWRPPEFARDLLPNYFKHNNFSSFVRQLNTYGFRKIVADRWEFANEFFRKGAKHLLAEIHRRKSSQPPPPPMPHQPYHHHHHHLNPFSLPPPPPAYHHHHLIQEEPATTAHCTVAGDGGEGGDFLAALSEDNRQLRRRNSLLLSELAHMKKLYNDIIYFLQNHVAPVTTTTTTPSSTAMAAAQHHLPAAASCRLMELDSPDHSPPPPPPKTPATDGGDTVKLFGVSLHGRKKRAHRDDDDGVHDQGSEV
>OsHSFB4c
MERCGSWSDCEAAAAAAQKAVPAPFLTKTYQLVDDPATDHIVSWGDDRVSTFVVWRPPEFARDILPNYFKHNNFSSFVRQLNTYGFRKVVPERWEFANEFFRKGEKQLLTEIHRRKTSSASTASPSPPPFFAPPHFPLFHHPGVAAAQHHHAFVGDDGVVAAHGIGMPFPQPHWREPNLPVATRLLALGGPAPSPSSAEAGGAGRAATAAVLMEENERLRRSNTALLQELAHMRKLYNDIIYFVQNHVRPVAPSPAAAAFLQGLGMQARKKPAAANVLNNSGGSTTSSSSLTIAEEPSPPPQQQHLAGEKSGGEAGSSSAARSSAPTKLFGVHLSAAPCGAGSKRASSPEEHPPTSPATKPRLVLECDDLSLTVAPSSSSQQQLSAASSPTSTS
>OsHSFB4d
MAFLVERCGGEMVVSMERSHGRSTTTAAAVTAAPAPFLSKTYQLVDDPSTDDVVSWGEDEATFVVWRPPEFARDLLPNYFKHNNFSSFVRQLNTYGFRKIVADRWEFANEFFRKGAKHLLSEIHRRKSSSCSQPQPPPPFPMHQHYPLSLFSPPTTPRSPPVGAAAAAAYHFQEEYCSSPADYAGGGGDLLAALSEDNRQLRRRNSLLLSELAHMRKLYNDIIYFLQNHVEPVAPPPLAAATSCRLVELGPSTTERRRCAASPSGDNDDDAAVRLFGVRLDDDHGKKRRVQLVQEDEGDEQGSEG
>OsHSFC1a
MDGLHTELALGLIGCCGGDGQQQTAPFVAKTYQMVCDPRTDALVRWGRDNNSFVVVDPAAFSQLLLPCFFKHGNFSSFVRQLNTYGFRKVHPDRWEFAHESFLRGQTHLLPRIVRRKKRGEGGGGGGGASCSFGGGAGEHQVAAAAASVGMSGEEEDAAEDVLAKEAALFEEVQRLRHEQTAIGEELARMSQRLQATERRPDQLMSFLAKLADDPNAVTGHLLEQAAERKRRRQHLPSHEPTVCPLPPAPPPQPPQPLLALAGAAAMDGTYWWTTEHHHHHHHQMKPMTVLPSLEPPTASCGVHQVPELGGGGVMGLTTDGEAKVEPPFPFCLLGQAFF
>OsHSFC1b
MPRETARRFTPVCRHTWPVCDKPESSQNQQAPPSPRHGANRMPPFVAAVCPIEPPSGHSLPSHLPERSRPKPVPPPPRRDPDKVGTRAHRAYVRYIYRNRYIGLTAPGGNILRAHSLPCPHRRTEQILARKKRALFSYPVPRARCHDRTGRILANYTIGCGTMMGGECKVHQLQAAGDGGPGAVAPFVAKTFHMVSDPSTNAVVRWGGAGNTFLVLDPAAFSDFLLPSYFKHRNFASFVRQLNTYGFRKVDPDRWEFAHESFLRGQAQLLPRIVRKKKKGGAAPGCRELCEEGEEVRGTIEAVQRLREEQRGMEEELQAMDQRLRAAESRPGQMMAFLAKLADEPGVVLRAMLAKKEELAAAGNNGSDPCKRRRIGADTGRGGVATGGDAAEMAQSRGT…
>OsHSFC2a
MTTTTAEGGGGVAPFVAKTYRMVDDPATDGVIAWGRDSNSFVVADPFAFSQTLLPAHFKHSNFSSFVRQLNTYGFRKVDPDRWEFAHVSFLRGQTHLLRRIVRRSSGGGGAKRKEEAGGCGGGGEAAAGDVDEESAVVALEVARLRREQREIEGRVAAMWRRVQETERRPKQMLAFLVKVVGDPQVLRRLVDRDNTNAAASNADDSAVHHQVKRPRLLLDSSSTTTTHGDRHLVTAAADGFYAGGCGPEAAAAAAFVPDDAVDFTGLYTGGDGFGNAVVDAGVDYPPAYAFPVVDSGY
>OsHSFC2b
MAAAAGGGAAPFVWKTYRMVEDPGTDGVIGWGKGNNSFVVADPFVFSQTLLPAHFKHNNFSSFVRQLNTYGFRKVDPDRWEFAHASFLRGQTHLLRNIVRRGSAAAGGGGGGGGGKRRDASADGGGGGGDEDMTMVATEVVRLKQEQRTIDDRVAAMWRRVQETERRPKQMLAFLLKVVGDRDKLHRLVGGGGNGNGAATAAAADNGFADAARAGCGEKRARLLLDGDNTGAFGPDAVDFAGFYTGADMFPDVAVDAAAAAAGGSAGCSFAFGVDSGY
