# Supplementary material for: Genome-wide Investigation and Expression Profiles of Heat Shock Transcription Factor (HSF) Gene Family in Maize (<em>Zea mays</em> L.) under Different Growth Stages and Abiotic Stress Conditions
Source: Preprints.org preprint supplement (doi:10.20944/preprints202109.0102.v1), 2021-09-06
Supplement: Supplementary file 2 [file Table S1.xlsx]

## Sheet: Sheet1
Table S1 Protein sequences of Zea mays HSFs.
>ZmHSF-01
MDLMLPVTVKEEWPPEEEEEEDVDADADAPRPMEGLHEVGPPPFLTKTFDLVADPATDEVISWGRAGNSFVVWDPHVFAAVLLPRFFKHNNFSSFVRQLNTYGFRKIDPDSWEFANEGFLRGQRHLLRLIKRRRPAPPPPYLQASQSQGSCLEVGRFGGLDGEMERLRRDKSILLAEVVKLRQEQQSTRAGMRAMEERLRHAEHKQVQMMGFLARAVQSPDLFQLLAQQQARRRELEGAALLSAASRKRRRPIGAAPANGGLQQQEEEQQQGDDDDPTATRALFAELDERGTTSELENLALNIQGLGKRRQDGSEKQGGRARSQQQGGFETAELTDDFWEELLNEGMKGGAEAETLPPERRRPAWYVDALAQKLSSMSNNTTAK
>ZmHSF-02
MGFTKRSPQHPASPAGGEVGAQTAGKVTPVPAAPESAPAAVVPRPPDVAPFLTKVYDMVSDPATDAVISWSAAGGSFVIWDSHAFERDLLPRHFKHNHFTSFIRQLNTYGFHKVDPDRWEWANEGFVKGQKHLLKTIKRKKKSSQDVPSDLQSVPVKTAPGTENIEIGKYGGLEKEVETLKRDKALLMQQLVDLRQYQQSSSAEVQNLIQRLRVMEQNQQQMMALLAIVVQNPDFLNQLVQQQRRSNWWNDDGNRKRRFQALEHGPVDDQETSGGGAQIIQYRPPVPETSNQPIPANEAFYSTPAQPASSPALEMPMDVEMASNNVNTFDSTGNDFTDTSALCEWDDMDIFGDELEHILQQPEQDFQVDPPLTVEDYGYDHPRLEQDCQMEAQQNCKNP…
>ZmHSF-03
MLRDRKLPESTSTTFLSLSHSSCATVHPSPIRGAAMVAEQATTTVAVGEPPTATPQPAAAAAAGQRSVPTPFLTKTYQLVDDPAVDDVISWNDDGSAFIVWRPAEFARDLLPKYFKHNNFSSFVRQLNTYGFRKIVPDRWEFANDCFRRGQKRLLCDIHRRKVTLPVAAATRAVTVVATIPMALPVDSPVYSGEEQVLSSSSSPEPPSLLQQQPTPSASGSGDMGEENERLRRENAWLARELGQMKKLCNNILLLMSKYAATKQPDAAKAAAAGNCSGGESSGAAAAPPLPSILELLPSCRRDPASAAVDAAAAAAGTEHEVDEKAGARLFGVSIGRKRMRDESSGHGGGGEDPVGRSAEVKAEPVDARLDHQHSATEPQSWPIYRPRPVYHPLRACSG…
>ZmHSF-04
MDKPVAPGIIKEELLEQQPPTQDGVGGGGDAPRPMEGLHEVGPPPFLTKTFDLVEDPATDAVLSWSRAGNSFIVWDPHVFAYGLLPRLFKHSNFSSFVRQLNTYGFRKVDPDRWEFANEGFLRGQRHLLKMIKRRKPPSAVAPLRQQRAPASCLEVGEFGFEEEIDRLKRDKNILITEVVKLRQEQQSTKDHVRAMEERLRVAEQKQVQMMGFLARAMRNPEFFQQLAQQQDKRKELEDTISKKRRRPIDNTPFYSDGESEQLDSQLKMFESGVLNGLNEPELENLAVNIQELGKGSIDDGNLTQVSDQSELNDDFWAELLVEDFGDKAGQPELEGRTEDVNDLAQQLGYLSSSSPK
>ZmHSF-05
MSHGNGMLNSVKVERWPAAVAANGQPRPMDVLHDGSSPPFLTKTYDMVDDPTTNAVVSWSAANNSFVVWDPHIFGTVLLPRYFKHNNFSSFVRQLNTYGFRKVDPDRWEFANEEFLRGQRHLLKNIRRRKPPHSSPNQQSLGSYLEVGHFGYEEEIDQLKRDKQLLMAEVVKLRQEHQNTRSDLQAMEEKLQDTEQKQQQMMAFMARVMQNPDFMRQLISQREMRKELEDAISKKRRRRIDQGHEAGSMGTGSSLEQGPQGVFEPQEPVESLANGVPSDLESSSVEAKGLEVRQGVSSGGSEHLNGRPSGELNDDFWEDLLHEGGLGADAGNAVGQDDMNMDMDPDVSLPQLKQHGPRH
>ZmHSF-06
MQGGVMAHAAAAAAAASTVTTAVAPPVTAHAVAVAPPVTAHAAAAAGNGSATAAPPPPFLMKTYEVVDDPATDDVISWGPGNNSFIVWNTPEFARDLLPKYFKHSNFSSFVRQLNTYGFRKVDPDRWEFANEGFLRGQKHLLKTINRRKPSLQGNSQPQQPQSQNAPVPSCVEVGKFGLEEEIERLKRDKNVLMQELVRLRQQQQTTDHQLQTLGKRLQGMESRQQQMMSFLAKAMQSPGFLAQFVQQNEKSRRRIVAANKKRRLPRQDGGLDSESAAASLDGQIIKYQPLINEAAKAMLRKILKLDSSHRLESMGNSENGNFLLENYMPGAQAFESSSSTRNSGVTLSEVSANPGLPYGGGGGTSSGLSAICPPEIQCPVVMDNMSSNQVPSMSAVPP…
>ZmHSF-07
MERCGSWDCDAAAAQKAVPAPFLTKTYQLVDDPATDHIVSWGDDRVSTFVVWRPPEFARDILPNYFKHNNFSSFVRQLNTYGFRKVVPERWEFGNEFFRKGEKQLLCEIHRRKTSTSAAPPSPPPFFAAPHFPLFHPDAPHHHHHHQFVGGGDDGAVAAAHVGGVGVALAFPHPHCWREPPHSAAPVATRLLALGAAPPAPSSPLPAADAGGGGRAAVLVEENERLRRSNAALLQELAHMRKLYNDIIYFVQNHVRPAAPSPAAAAFLQGLGLQARKKPAAGPLNHSGGSTTSSSSLTIAEEEPSPPPPPQQADKSAGSSGTARSAADRAPPTMLFGVHLSAARGSKRPASPEEEDDQSPTSPAGKPRLALECAGLSLAVAVPSAGASSPASTS
>ZmHSF-08
MVEEGATAAASRSGPAPFLSKTHQMVEERGTDEVISWAEQGRSFVVWKPVELARDLLPLHFKHCNFSSFVRQLNTYGFRKVVPDRWEFANENFRRGEQGLLSGIRRRKSTTPQPSKYGGGSVVNTAFPPPLPLPPPASVTTSGGGGAGGAGNERSSSSASSPPRTDDLTSENEQLKKDNRTLSTELAQARRHCEELLGFLSRFLDVRQLDLGLLMQEDVRAGAGDDAAPRRAMVSQLERGGEEGKSVKLFGVLLTDAARKRARCEEAAASERPIKMIRIGEPWIGVPSSGPGRCGGGN
>ZmHSF-09
MDGLHTELALGLLECGVVGSGGETAPFVAKTYQMVCDSRTDALVRWGRGNNSFVVADPAGFSRLLLPCFFKHSNFSSFVRQLNTYGFRKVHPDRWEFAHESFLRGQTHLLPRIVRRKKRGGGGGACSSGGDAPQAGCCISTMGEDHRPEADPDEKQEADAEAALLEEVQRLRQEQTAIGEELAQMSRRLQATERRPDQLMSFLDRLAEDPDGVTRNLVEQAAEKKRRRMQLASQSQPARPPLPPAPPPPVLHPLLALGGAAAKGLDGWQWAELQKPSVVLPAFDFDPAASCCGAQHAPNLGGAGIIGMGLTADETTVETPFPFCLLGQGFF
>ZmHSF-10
MLHRRCLQGTTYKKKLQTVLFFFPKNFYNFRSIMALVVCSCLYKMPKPRTPSPRPPHRIATGPPRSQMASSSSCPLAPGTSGCKPRTTRTSGVGFGVEAMARSVAAVKLEPKPEPWAAEAEEGSSVVPRSMEGPPFPAPFVAKTYEMVSDAATDAVVSWAPCGAGNTFVVWDPQALATGILPRFFKHANFASFVRQLNVYGFRKVNPDRWEFANESFLAGQKHLLKSIRRRRASKPQVEASPRNSASACSGQPNKDPGVVESLKRDRAALRAEVITLRQQYSICKSQLVALEERILNNERDQQKAIAFFAKVLSNPAFVQQVLRNYARERELHGASKRQRLMENEGHRQGDLPLRGSTEAAFATGAAGVSVGTGSTNVGTAARQEESGSELNDQEVNSI…
>ZmHSF-11
MAAEHATAAVGEPPPATSQPAEGVTAAAGQRSVPTPFLSKTYQLVDDPAVDDIISWNDDGSAFIVWRPAEFARDLLPKYFKHNNFSSFVRQLNTYGFRKIVPDRWEFANDCFRRGEKRLLCDIHRRKVSPATGAVTVAAAAAAIPMALPVGSPVYSGEEQVLSSSSPEPPSLQQHPPAPSGSGSGGVVSGDVGEENERLRRENARLARELGQMKKLCNNILLLMSKYAATQQPDAAKEAAAGNCTGESSDAAAAPPLPSILELLPSCRADPAPAAAGTDHEDDEKAGARLFGVSIGRKRMRDESDHHAGVCAAEVKAEPVDARPDQQRQRNATEPQSWPIYRPRPVYHPLRACNGSGSAGSDHDGSNDSR
>ZmHSF-12
MQGGGVAAAAVPVHAAVGGDGGGAAAAPPPPFLMKTYEMVDDPATDGVVSWGPGNNSFIVWNTPEFARDLLPKYFKHSNFSSFVRQLNTYGFRKVDPDRWEFANEGFLRGQKHLLKTINRRKPSLQGNSQPQQPQLQNAPVPSCVEVGKFGLEEEIERLKRDKNVLMQELVRLRQQQQTTDHQLQTLGKRLQGMESRQQQMMSFLAKAMQSPGFLAQFVQRNENSRRRIVAANKKRRLPKQDGGLESESSAASLDGQIIKYQPSINEAAKAMLRKILNVDSSHRFESMGNSDNSNNNNILLEDYMPAAQAFESSSSTRNSGVTLAEVPANSGLAYVGTSSAICSPPAAPEMQCPVVLDNKAYKQVASMSAVPPVSSDMGIIPEFSDLADLVSVDILGGA…
>ZmHSF-13
MDSNRSMATSGVAPFVAKTYRMVDDPATDGVVAWGRDNNSFVVADPFAFSQTLLPAHFKHSNFSSFVRQLNTYGFRKVDPDRWEFAHVSFLRGQTHLLGQIVRRSNGGKRKDDGNGAGSGSADDEDAVAMEVVRLRREQRAIEEQVAAMWRRVQETERRPKQMLAFLVKVAGDPQVLRRLVSGAGGDAVFAAAEPEDGASIKRARLLLDAGSGGDGAVDFSGLYSTTAGSEDDGVGFGSDYLQPPPPYVFPVNSGGY
>ZmHSF-14
MVTNPSPRGRGDSPLHLGVGIHQPSPTRSRQQAAAAARAAAAPVMEVAGAREPGSGGGGGGGGGGPAPFLLKTYEMVDDPSSDAVVSWSDASDGSFVVWNQPEFAARMLPTYFKHNNFSSFIRQLNTYGFRKIDPERWEFANEYFVKGQKHLLKNIHRRKPIHSHSHQPGALPDNERALFEDEIDRLSREKAALQADLWKFNQQQSGAVNQLEDLERRVLDMEQRQTKMLSFLQQARKNPQFVRKLVKMAEESPIFADAFHKKRRLPGLECITDATETATSFFDDHSSSSRQEMGNLLNQHFSDKLKLGLCPAMAESNLITLSTQSSHEDNGSPLGKHPDYERTGMECLPLVPQMMELSDTGTSICPSKSVSFTTAANDDGFLPCHLNLSLASCPMDVV…
>ZmHSF-15
MHRARPTAHANDPDAPYAAAVAMLLEPKLEDEELPLQQLASPGPFVSLDQLMPAVAVPAEPRPLEALLQGPQLPPFLSKTYDLVNEPALDGVISWGAAGNSFVVWDPSTFARDVLPHNFKHNNFSSFVRQLNTYGFRKVHADRWEFAHEDFLRDSKHLLKRIVRRRSSPTKQSSVQPGSSSGESSLDPELHTLRREKNALLEEVARLKQEHRQTIEQMSTLNHRLESAEDRQRQMVSFLAKLLQNPSFVRKLKLHREKKEIDSTRVKRKFLKHVPHGSVESGESSSQHAGENGSYFAVSSPMATTTSVHDDITELQNFLLEDDDLNFGMDSENTGLEGTEATDDIGELIQGFDTQEELDLGSGAELQEMPPASGPLARDPTIGRFKGKNVLCPGLDATS…
>ZmHSF-16
MEGSNSNSHGGAGGGGGGSSSPTPFLVKTYEMVEDPATIHVVSWGPGGASFVVWNPPDLSRDLLPKYFKHSNFSSFIRQLNTYGFRKINPERWEFANDDFIRGHKHLLKRIHRRKPVHSHSLRTQASGPLAESQRRELEDEISRLRYEKSLLLADLQRQNQQQRGISWQMQSLESRLAQMEERQRSVVASLCDILQRRGVVRVPASALETTDHSSKKRRVPIPKTDLFVAGEQPKVEEQQVLPFLQAVGAEAPGVSPIRVLDAEPFQKMELALVSLEDFFQRAAPPAPALEMCTGAAAAAAEPSPPLTLGEMLSVPAPVDTNIDLQLQSSACQNPFASTSGRDQMSSPLAEPPSYAQSPMLLPMAQLHGYDYRAAQVDMCSDTTTGDTSQDETTSETGG…
>ZmHSF-17
MDSTLNQVKEESHGEGGDLMAGTVEAADGPSAAVAAAPKPMEGLHDPGPPPFLTKTYDMVDDSDTDLIVSWSATNNSFVVWDPHAFATVLLPRHFKHNNFSSFVRQLNTYGFRKVDPDRWEFANEGFLRGQRHLLKNIRRRKPPAQNATNQQSIGPYLEVGHFGYDAEIDMLKRDKQLLMAEVVKLRQEQQNTKANLKAMEDRLQGTEQKQQQMMAFLARVMRNPEFLKHLVSQNEMRKELQDAISKKRRRRIDQGPEADDLGASSSLEQGSPVLFNAQDPVEFLVDGIPADLESPAFDGHGLIGPHDIDIDIDIGSTSEQQQDMPQEDLNDNFWEQLLNEGLGEENDSPVIEDDMNVLSEKMGYLNSDGPTSSN
>ZmHSF-18
MGEAAAAVAASKRGGGPAPFLTKTHQMVEERGTDEVISWAEQGRSFVVWKPVELARDLLPLHFKHCNFSSFVRQLNTYGFRKVVPDRWEFANDNFRRGEQGLLSGIRRRKSTALQMSKSGSGGSGGVNATFPPPLPPPPPASATTSGVHERSSSSASSPPRAPDLASENEQLKKDNHTLSAELAQARRHCEELLGFLSRFLDVRQLDLRLLMQEDVRAGASDDGAQRRAHAVASQLERGGGEEGKSVKLFGVLLKDAARKRGRCEEAAASERPIKMIRVGEPWVGVPSSGPGRCGGEN
>ZmHSF-19
MAEQGGAAGEAAGSDPPAPAPATAPAPAPALAADAAGQRSLPTPFLTKTYQLVDDPAVDDVISWNEDGSTFVVWRPAEFARDLLPKYFKHNNFSSFVRQLNTYGFRKMVPDRWEFANDFFRRGEKRLLCDIHRRKVAPAPAAGLATAAAAAASGAVTVAAAPIPMALPVRPASPSLSTDEHVLSSNSGSAEDHPQAAASGSVSASASGDTGEENERLRRENARLTRELGQMKKLCNNILLLMTKYASSQQLDASAALSSVVNCSGESSEAVPAPPPLPPAILELMPACPGLATAAAGLVAEADPDQASRLFGVSIGMKRMRDDDDTGEEQADHGAAADVKTEASDPQHRMEPSPESPDQHPWPIYRPTPVYHSMRPCNGPDQGAGSDQDGSNSR
>ZmHSF-20
MEGSNSSSQPPPFLIKTYEMVEDPATNHVVSWGPGGASFVVWNPPDFSRDLLPKYFKHNNFSSFIRQLNTYGFRKIDPERWEFANDDFVRGHTHLLKNIHRRKPVHSHSPQTQVNGPLAESERRELEDEISRLKYEKSLLLTDLQRQSQQRCGISWQMQSLERRLAQMEERQRNIVASLRDILLPVGHGVVSWGSATGADHFSKKRRVPKMDFFVDEPKVEEQQVPFLQTVGAETPGMSPIRLLSAEPFEKMELALVSLESFLQRATAHTSAAQGMLYAAGVAEPSPALALGEMLSAPMDTEIDLQPSACQNPFASTSGQDQSSSPLAEPPSYYAQSPMLPMAQLHEHAHRTAAGVDMNSDTTTGDTSQDDTTSETGGSHVPAKVNDVFWERFLTDAAE…
>ZmHSF-21
MMDGLHTDLALGLLGCGGVGVGSSGRGEQLQTAPFVAKTYQMVCDPRTDALVRWGSENNSFVVVDPAGFSRLLLPCFFKHRNFSSFVRQLNTYGFRKVHPDRWEFAHESFLRGQTHLLPRIVRRKKRGEGACTSSGGDAQAQYAAAAAGCCISMGGEDHRTEGEAEAAVLEEVQRLRQEQTAIGEELAQMSRRLQATERRPDQLMSFLARLAEDPDGVTRHLVEQAAEKKRRRMMQLASQPVRRLPPPPPPPPVLHHPLLALGGAAAAAAKGLDGGCQWAEQKKPSVVLTAAFDHPAASYCGAQHAVPNLGGGNGGGGINGMGLTADETAVETTTTPFPFCLLGQGFF
>ZmHSF-22
MEGASSLPPFLSKTYEMVDDPATDAVVAWTPLGTSFVVANQAEFWRDLLPKYFKHNNFSSFVRQLNTYGFKKIDPEQWEFANDDFIRGQQHRLKNIHRRKPIFSHSSHTQGSGPLPDTERRDYEEEIERLKCDNAALTSELEKNAQKKLVTEKRMQDLEDKLIFLEDRQKNLMAYVRDIVQAPGSFSSFVQQPDHHGKKRRLPVPISLYQDSNAKGNQVVHGSFITNPPACRESFDKTESSLNSLENFLREASEAFNISYDDGLPGPSSAVVITELHSSGESDPHVPSPVSRMHTSSAGAGDSLSSRDLTESTSCAESPRLPQIQPCTDSRTKVSEIDVNREPAVTETGPTRDQPAEEPPHVAAGVNDGFWQQFLTEQPGPDVHQEAQSERRDGDDDKG…
>ZmHSF-23
MERPDVTVKQEEEDEVVVVLDGDGDACGHWPGAGAAPEPWQTPVGSAVPPFLAKTFELVEDPATDAVISWGAARNSFVVWDPHAFAAGHLPRRFKHGNFSTFLRQLNTYGFRKVSPDRWEFAHTDFLAGQRHLLVNIRRRRGGAAGSTASPSSAGAGGDRDSELETLRRDREALARELTRLRREQEEARAQLLDMERRVRGTERRQEQCTAFLARAIRNPAFLDGLLARRCGAHVEAGRKRRLLDAAAAGPDPADVLDIEELAMAAGAEVGVASIPAVAAAQISNTANATDMIWYELLGEEQVEIDAEVHDLVAAAAAATDELAQPWAEMDEKEVAELVRQIDCLASPSP
>ZmHSF-24
MGSKKRSPQHPASPAGGEVGAQAAGKATPVTAAPETAPVAVVPKPPDVAPFLTKVYDMVSDPATDAVISWSAGGGSFVIWDSHVFERDLLPRHFKHNHFTSFIRQLNTYGFHKVDPDRWEWANEGFIKGQKHLLKTIKRKKKSSQDVPSDLQSVPVKTAPGTENIEIGKYGGLEKEVETLKRDKALLMQQLVDLRQYQQTSSLEVQSLIQRLRVMEQNQQQMMALLAIVVHNPDFLNQLVQQQCRSNWWNDDGNRKRRFQALEHGPVDDSETSGGGAQIIQYCPPVPETSNQPTPANEAFCSSPVQSVSSHALEMPMDVEMASNNVGTLDSTGNDFTDTSALCEWDDMDIFGGGLEHILQQTEQDFQVDPLTIEDYGYDRPWLEQDCQVEAQQNCKNPQ…
>ZmHSF-25
MALPAAGTPPFLTKTYAMVEDSATDDTISWNDTGTAFVVWRPAEFARDLLPKHFKHSNFSSFVRQLNTYGFKKVVGDRWEFANDGFRRGEKHLLAGIQRRKGTGAVAAVPVPGIPAGIPLPLSSPPTSSGGEPAVSSSPPRGSTAGVSGAVAELEEENARLRRENARLARELARARRLCDGVRQLMARYDDDQGRGGDEDPADGDEGHGGSGEGPSGPEVKPMLFGVPIGAKRLRGARGDGDDVDDGEDNDEEQDEDDERQTVRKQGVKAARRNEASDLDVLTLSVRAAAAARTGGGSRDRKSPINAHPDRSLSLGLK
