# Supplementary material for: Genome-wide Investigation and Expression Profiles of Heat Shock Transcription Factor (HSF) Gene Family in Maize (<em>Zea mays</em> L.) under Different Growth Stages and Abiotic Stress Conditions
Source: Preprints.org preprint supplement (doi:10.20944/preprints202109.0102.v1), 2021-09-06
Supplement: Supplementary file 4 [file Table S3.xlsx]

## Sheet: Sheet1
Table S3 The class specific amino acid composition of Zea mays HSFs
Class A HSFs
Amino acid	Percentage Composition
Ala	8.7
Leu	8.3
Ser	7.8
Glu	7.4
Gly	7.3
Pro	6.8
Asp	6.8
Arg	6.4
Val	6.1
Gln	6.2
Lys	4.4
Thr	4.3
Asn	4.2
Phe	4.1
Met	2.7
His	2.4
Tyr	1.4
Trp	1.3
Ile	2.7
Cys	0.8
Class B HSFs
Ala	12.6
Ser	9.3
Pro	8.7
Leu	7.6
Gly	7.5
Arg	7.3
Glu	6.5
Val	5.9
Asp	5.5
Thr	4.2
Gln	3.9
Phe	3.6
Lys	3.6
Asn	3.1
His	2.7
Ile	2.1
Met	1.9
Tyr	1.4
Cys	1.4
Trp	1.3
Class C HSFs
Ala	11.2
Gly	10.9
Leu	9.1
Arg	7.9
Val	6.7
Pro	6.6
Asp	5.8
Glu	5.8
Ser	5.7
Gln	5.2
Phe	5.1
Thr	4.4
Lys	3
His	2.5
Met	2.4
Asn	2.2
Cys	1.9
Ile	1.3
Tyr	1.3
Trp	1.1
