# Supplementary material for: Genome-wide Investigation and Expression Profiles of Heat Shock Transcription Factor (HSF) Gene Family in Maize (<em>Zea mays</em> L.) under Different Growth Stages and Abiotic Stress Conditions
Source: Preprints.org preprint supplement (doi:10.20944/preprints202109.0102.v1), 2021-09-06
Supplement: Supplementary file 5 [file Table S4.xlsx]

## Sheet: Sheet1
Table S4 TPM values of Zea mays HSFs under different growth stages across various tissues.
Gene_name	DAP_Embryo	16DAP_Embryo	24DAP_Embryo	12DAP_Endopsperm	18DAP_Endosperm	24DAP_Endosperm	4DAP_Whole_Seed	12DAP_Whole_seed	24DAP_Whole_Seed
ZmHSF-01	0.1	0.1	0.1	0	0	0	0.1	0.2	0
ZmHSF-02	2.4	1.5	1.8	0	3	3.1	3.3	3.6	2.7
ZmHSF-03	1.6	1.1	1.3	0	0	0	0.1	0	0.1
ZmHSF-04	5.4	2.9	4.2	0	4.1	1.8	3.8	16.6	2.5
ZmHSF-05	17.1	16.1	17.9	0	5.2	4	21.7	19.2	8.4
ZmHSF-06	23.7	23.7	25.5	0	11.7	10.1	21.2	15.2	12.3
ZmHSF-07	1.1	5	0.4	0	1.1	0.2	0.1	2.8	0.3
ZmHSF-08	1.4	3.9	1.4	0	0	0	0.4	0	0.1
ZmHSF-09	0.3	1.1	0.3	0	6.8	4.9	0.4	3.3	6
ZmHSF-10	0	0.1	0.2	0	0	0	0.1	0	0
ZmHSF-11	0.6	0.2	0.7	0	0.1	0	0.6	0.4	0.1
ZmHSF-12	0	0.3	0	0	1.5	0.5	0	1	0.5
ZmHSF-13	2.7	3.7	2.6	0	2.4	1.8	3.9	4.3	2.3
ZmHSF-14	0.2	0.8	1.2	0	0.3	0.1	0.7	0	0.3
ZmHSF15	4.6	3.9	4.4	0	1.6	0.7	5.2	5.9	1.9
ZmHSF-16	0.2	0.4	0.5	0	0.2	0.3	1	0.8	0.4
ZmHSF-17	0	0	0	0	0	0.1	0	0	0
ZmHSF-18	0.1	0.3	0	0	1.2	2	0.1	1	2
ZmHSF-19	1	2.1	0.6	0	2	1.3	0.4	3.3	1
ZmHSF-20	2.8	3.8	2.5	0	0	0	0.6	0	0.3
ZmHSF-21	0.2	0.2	0.2	0	0.3	0.4	0.3	0.4	0.3
ZmHSF-22	0	0	0	0	0	0	0	0	0
ZmHSF-23	1	1.1	1.2	0	1.3	1	1.8	2.1	1.1
ZmHSF-24	0	0	0	0	0	0	0	0	0
ZmHSF-25	2.2	1.4	1.9	0	1.4	1.2	2.4	2.2	1.5

## Sheet: Sheet2
Gene_name	4 DAS Primary root	6 DAS Primary Root	Whole Primary Root-7d	Tap Root Z1_7d	Tap Root Z2-7d	Tap Root Z3-7d	Tap Root Z4-7d	Whole Root System-3d	Whole Root System 7d	Stem and SAM	Immature_Leaves	Tip of Stage 2 Leaf	MATURE LEAF TISSUE leaf 8	Pooled Leaves	Topmost leaf	Vegetative Meristem and surrounding_Tissue
ZmHSF-01	2.1	1	0.7	2.4	0.7	13.5	0.4	1.1	0.6	0.9	0.9	34.2	4	10.1	8.7	0.1
ZmHSF-02	6.9	3.1	4	2.4	2	3.2	3.2	2.5	3.2	3.3	3.4	2	5.9	2.5	2.5	3.7
ZmHSF-03	1.1	0	0	0.1	0	0	0	0	0	3.4	0	0	0	0	0	19.1
ZmHSF-04	77	7.7	8.7	14.6	10.5	26.9	5.8	9.9	7.6	13.4	15.8	25.4	27.3	4.2	10.1	9.2
ZmHSF-05	22	9.9	23.7	16.1	20.8	25.9	27.1	9.7	21.5	11.6	17.7	16.2	90.7	13.7	12.3	39.2
ZmHSF-06	13.7	11.5	17.4	16	17.5	18.6	20	10.6	15.3	16.8	11.9	9.1	29.9	11.8	11.8	39.7
ZmHSF-07	4	0.3	0.6	1.4	0.4	3.5	0.4	1.1	0.3	2.6	2	2.8	0.4	0.4	1.4	0.4
ZmHSF-08	1.7	0.3	0.6	0.5	0.6	0.2	0.2	1.2	0.4	2.1	0.6	0	0	0	0	13.8
ZmHSF-09	2.4	1.8	7.1	9.2	4.1	8.7	8.5	2.6	5	2.1	1.7	1.4	3.7	0.7	1.3	0.3
ZmHSF-10	0.3	0.1	1.6	0.1	1.1	0.5	0.2	1.3	1.2	0	0	0	0.1	0	0	0.2
ZmHSF-11	0.8	0.4	0.8	0.4	0.4	0.3	0.6	0.1	0.4	0.5	0.4	0.1	1.1	0.1	0.1	1.2
ZmHSF-12	1.5	0.1	1	1	0.7	0.8	0.2	0.4	0.7	0.1	5.2	0	2.1	0	0	0.2
ZmHSF-13	3.7	6	8.5	5.6	7	5.9	6.9	5.7	8.1	4.5	3.5	2.8	8	3.1	4.3	8.3
ZmHSF-14	2.5	2.8	6.9	1.2	16.9	6.1	2.8	2.5	2.4	1.4	0.7	2.3	2.7	1.4	1.7	31.8
ZmHSF15	5.9	5.1	9.8	4.2	6.2	6.5	6.7	5.4	8.5	4.3	6.7	1.2	8.9	2.5	2.6	10.6
ZmHSF-16	1	0.2	1.2	0.6	1.9	1.3	0.9	1.5	1.1	0.2	0.2	1	12.4	0.3	0.9	3.5
ZmHSF-17	0.2	0	0.7	0.2	0.5	0.6	0.4	0.3	0.8	0.1	0	0.2	0.3	0.1	0	0.1
ZmHSF-18	0.2	0.4	1.7	1	0.7	1.9	3	0.2	1.1	0.4	0.3	0.2	0.3	0.2	0.2	0
ZmHSF-19	12.7	4	7.3	4.1	5.1	7.1	2.2	4.2	5.9	7.3	16.1	4.6	7.2	2.8	3.1	13.3
ZmHSF-20	4.6	1	1.1	1.1	1.2	0.3	0.6	0.7	0.9	3.6	0.5	0	0.1	0.1	0.2	21.2
ZmHSF-21	0.6	2.7	2.3	2	1.1	1.4	1.9	0.4	2.1	0.3	0.4	0.3	0.2	0.3	0.3	0.3
ZmHSF-22	0.1	0	0	0	0	0	0	0	0	0.2	0	0	0	0	0	0
ZmHSF-23	2.7	3	3.6	2.9	2.9	3.4	3.1	2.7	2.9	1.6	2.7	2	5.1	2.2	3.1	2.4
ZmHSF-24	0	0	0.1	0	0	0	0	0	0	0	0	0	0.1	0	0	0
ZmHSF-25	2.9	1	2.4	2.2	1.9	3	2.8	2.2	1.9	2.5	2.7	2.2	7	2.1	3.2	4.1

## Sheet: Sheet3
Table S4 TPM values of Zea mays HSFs under different growth stages across various tissues.
Gene_name	Immature tassel	Meiotic tassel	Anthers	Mature pollen	Mature female spikelets	Pre-pollination cob	Immature cob	Silks
ZmHSF-01	0.3	0.4	0.6	0	0.1	0.1	0.2	2.2
ZmHSF-02	4.1	11.2	5.7	3.2	2.9	2.4	3.2	2.7
ZmHSF-03	0.3	0.1	0	0	1.2	0.7	0.8	0.1
ZmHSF-04	33.4	25.5	1.4	0.6	1.6	2.5	31.7	3.9
ZmHSF-05	15.2	28.5	15.1	3.3	42.6	17.1	24.6	31.1
ZmHSF-06	15.4	15.5	12.9	0.7	52.7	21.1	18.7	29.8
ZmHSF-07	1.5	2.3	0.1	0.1	1.5	0	1.2	0.6
ZmHSF-08	2.5	0.1	0	0	6.4	1.1	1.5	0.1
ZmHSF-09	0.1	2.2	2	0	1.2	0	0	44.6
ZmHSF-10	0	0	0	0	1.5	0	0	7.6
ZmHSF-11	0.8	0.2	0.3	0	2.1	0.6	1	1
ZmHSF-12	0.3	1.1	0	0	2.9	0	0.1	1.9
ZmHSF-13	3.3	4.1	2.4	0.3	7.7	3.6	2.8	3.6
ZmHSF-14	0	0.1	1.8	0.1	6.2	0.1	0	14.6
ZmHSF15	3.4	8.7	2.4	0	18.2	3.9	3.9	16.3
ZmHSF-16	1.1	2.5	0.5	1.2	2.8	0.4	1.1	7
ZmHSF-17	0.1	0	0.1	0	0.2	0.1	0.1	0
ZmHSF-18	0	1.3	0.6	0	0.1	0	0	4.3
ZmHSF-19	6.1	4.2	0.1	0.2	19.2	0.3	4.4	5.1
ZmHSF-20	3.2	0.1	0.2	0.1	2.7	1.6	5	0.1
ZmHSF-21	0.3	0.3	0.1	0	0.7	0.3	0.3	2.4
ZmHSF-22	0	0	0	0.1	0.8	0	0	0.6
ZmHSF-23	1.4	2.7	1.6	0.1	3.2	1.3	0.9	3.2
ZmHSF-24	0	0	0	0	0	0	0	0
ZmHSF-25	2.4	4.8	2.9	1.2	1.4	2.1	2.9	2.9
