# Supplementary material for: Genome-wide Investigation and Expression Profiles of Heat Shock Transcription Factor (HSF) Gene Family in Maize (<em>Zea mays</em> L.) under Different Growth Stages and Abiotic Stress Conditions
Source: Preprints.org preprint supplement (doi:10.20944/preprints202109.0102.v1), 2021-09-06
Supplement: Supplementary file 6 [file Table S5.xlsx]

## Sheet: Sheet1
Table S5 TPM values of Zea mays HSFs under multiple abiotic stress conditions.
Gene_name	control	Heat	Drought	Cold	UV	Salt
ZmHSF-01	6.5	104	1.5	4.5	3.90094	12.3929
ZmHSF-02	2.4	18.5	2.5	2.2	2.24894	7.26877
ZmHSF-03	0.3	0	0.1	0.1	0	0
ZmHSF-04	5.5	114.3	10.2	6.4	11.3637	32.5236
ZmHSF-05	18.3	299.4	16.5	12.4	17.0217	111.325
ZmHSF-06	10.4	3.2	6.5	7	8.28495	13.1237
ZmHSF-07	1.1	45.5	1	0.3	2.1567	16.3549
ZmHSF-08	0.4	0	0.2	0	0.723919	0.214498
ZmHSF-09	2.1	4.1	1.9	1.1	2.63936	19.3686
ZmHSF-10	0	0.1	0	0.5	0	0
ZmHSF-11	0.2	0.1	0.4	0.1	0.187223	0.460079
ZmHSF-12	0.1	44	1.5	0.8	2.31633	13.8984
ZmHSF-13	3.3	1.7	2.3	5.2	2.85968	2.96163
ZmHSF-14	8	8.3	7.2	3.1	3.71802	135.149
ZmHSF15	4.3	3	4.2	4.8	3.05113	3.53297
ZmHSF-16	0.5	1	1.4	50.1	0.158827	0.276565
ZmHSF-17	0.1	0.1	0	0	0	0
ZmHSF-18	0.1	0.2	0.4	0.1	1.30802	0.235579
ZmHSF-19	7.8	26.6	6.3	2.5	10.5786	28.3161
ZmHSF-20	0.8	0.2	0.1	0.6	1.07059	0.132337
ZmHSF-21	0.2	0.7	0.5	0.5	1.82497	0
ZmHSF-22	0	0.1	0	0	0	0
ZmHSF-23	1.8	4.5	2.2	5.3	1.63942	4.16603
ZmHSF-24	0.1	441.9	0	1.6	0	0.356852
ZmHSF-25	1.7	2.5	3	4.6	3.13962	3.54397
