# Supplementary material for: Genome-wide Investigation and Expression Profiles of Heat Shock Transcription Factor (HSF) Gene Family in Maize (<em>Zea mays</em> L.) under Different Growth Stages and Abiotic Stress Conditions
Source: Preprints.org preprint supplement (doi:10.20944/preprints202109.0102.v1), 2021-09-06
Supplement: Supplementary file 7 [file Table S6.xlsx]

## Sheet: Sheet1
Table S6 GO annotation file of Zea mays HSFs.
GO biological process complete	Fold Enrichment	Raw P-value	FDR
cellular response to heat (GO:0034605)	100	3.72e-39	1.75e-35
response to heat (GO:0009408)	100	5.67e-32	8.9e-29
response to temperature stimulus (GO:0009266)	100	2.14e-28	2.52e-25
regulation of transcription by RNA polymerase II (GO:0006357)	48.95	1.24e-35	2.92e-32
response to abiotic stimulus (GO:0009628)	39.92	1.56e-21	3.67e-19
cellular response to stress (GO:0033554)	20.18	1.8e-18	3.54e-16
regulation of RNA biosynthetic process (GO:2001141)	13.33	9.77e-27	9.2e-24
regulation of transcription, DNA-templated (GO:0006355)	13.33	9.77e-27	7.67e-24
regulation of nucleic acid-templated transcription (GO:1903506)	13.33	9.77e-27	6.57e-24
regulation of RNA metabolic process (GO:0051252)	12.65	3.41e-26	2.01e-23
regulation of nucleobase-containing compound metabolic process (GO:0019219)	12.44	5.03e-26	2.63e-23
regulation of cellular macromolecule biosynthetic process (GO:2000112)	12.12	9.34e-26	4.4e-23
regulation of macromolecule biosynthetic process (GO:0010556)	12.1	9.77e-26	4.19e-23
regulation of cellular biosynthetic process (GO:0031326)	12.03	1.12e-25	4.4e-23
regulation of biosynthetic process (GO:0009889)	12	1.18e-25	4.28e-23
regulation of gene expression (GO:0010468)	11.13	7.19e-25	2.42e-22
response to stress (GO:0006950)	10.73	3.28e-14	6.18e-12
regulation of nitrogen compound metabolic process (GO:0051171)	10.69	1.85e-24	5.83e-22
regulation of primary metabolic process (GO:0080090)	10.59	2.35e-24	6.91e-22
regulation of cellular metabolic process (GO:0031323)	10.44	3.31e-24	9.17e-22
regulation of macromolecule metabolic process (GO:0060255)	9.88	1.22e-23	3.19e-21
regulation of metabolic process (GO:0019222)	9.65	2.15e-23	5.33e-21
cellular response to stimulus (GO:0051716)	9.28	3.03e-13	5.5e-11
regulation of cellular process (GO:0050794)	7.55	7.48e-21	1.68e-18
regulation of biological process (GO:0050789)	6.9	6.32e-20	1.35e-17
response to stimulus (GO:0050896)	6.15	1.56e-10	2.73e-08
biological regulation (GO:0065007)	6.11	1.14e-18	2.33e-16
biological_process (GO:0008150)	1.7	1.76e-05	0.00296
GO molecular function complete
RNA polymerase II cis-regulatory region sequence-specific DNA binding (GO:0000978)	100	4.1e-43	1.05e-39
cis-regulatory region sequence-specific DNA binding (GO:0000987)	100	5.72e-43	7.3e-40
RNA polymerase II transcription regulatory region sequence-specific DNA binding (GO:0000977)	99.88	2.8e-42	2.39e-39
transcription regulatory region nucleic acid binding (GO:0001067)	61.34	9.55e-38	6.1e-35
transcription cis-regulatory region binding (GO:0000976)	61.34	9.55e-38	4.88e-35
sequence-specific double-stranded DNA binding (GO:1990837)	59.14	2.09e-37	8.92e-35
double-stranded DNA binding (GO:0003690)	49.16	1.13e-35	4.12e-33
sequence-specific DNA binding (GO:0043565)	30.94	1.94e-35	6.21e-33
DNA-binding transcription factor activity (GO:0003700)	24.11	7.25e-33	2.06e-30
transcription regulator activity (GO:0140110)	21.47	1.15e-31	2.93e-29
DNA binding (GO:0003677)	12.45	4.99e-26	1.16e-23
nucleic acid binding (GO:0003676)	7.22	2.13e-20	4.53e-18
heterocyclic compound binding (GO:1901363)	3.81	8.49e-14	1.67e-11
organic cyclic compound binding (GO:0097159)	3.8	8.99e-14	1.64e-11
binding (GO:0005488)	2.73	2.14e-10	3.64e-08
molecular_function (GO:0003674)	1.63	4.66e-05	0.00744
GO cellular component complete
nucleus (GO:0005634)	6.03	1.56e-18	1.46e-15
intracellular membrane-bounded organelle (GO:0043231)	3.17	6.38e-12	2.98e-09
membrane-bounded organelle (GO:0043227)	3.16	6.68e-12	2.08e-09
intracellular organelle (GO:0043229)	2.91	4.96e-11	1.16e-08
organelle (GO:0043226)	2.9	5.01e-11	9.37e-09
intracellular anatomical structure (GO:0005622)	2.5	1.62e-09	2.53e-07
cellular anatomical entity (GO:0110165)	1.76	7.07e-06	0.000945
cellular_component (GO:0005575)	1.74	8.28e-06	0.00086
