# Supplementary material for: Genome-wide Investigation and Expression Profiles of Heat Shock Transcription Factor (HSF) Gene Family in Maize (<em>Zea mays</em> L.) under Different Growth Stages and Abiotic Stress Conditions
Source: Preprints.org preprint supplement (doi:10.20944/preprints202109.0102.v1), 2021-09-06
Supplement: Supplementary file 8 [file Table S7.xlsx]

## Sheet: Sheet1
Table S7 Protein-protein interaction network file of Zea mays HSFs.
node1	node2	node1_string_id	node2_string_id	homology	experimentally_determined_interaction	database_annotated	automated_textmining	combined_score
100281934	GRMZM2G005815_P01	4577.GRMZM2G082390_P01	4577.GRMZM2G005815_P01	0	0.678	0	0.196	0.73
100281934	GRMZM2G173090_P02	4577.GRMZM2G082390_P01	4577.GRMZM2G173090_P01	0	0.678	0	0.196	0.73
100285484	GRMZM2G105348_P01	4577.GRMZM2G023786_P01	4577.GRMZM2G105348_P01	0	0.179	0	0.457	0.535
100285484	GRMZM2G086880_P01	4577.GRMZM2G023786_P01	4577.GRMZM2G086880_P01	0	0.179	0	0.716	0.756
100285484	GRMZM2G089525_P01	4577.GRMZM2G023786_P01	4577.GRMZM2G089525_P01	0	0.179	0	0.716	0.756
109621226	AC205471.4_FGP003	4577.GRMZM2G003489_P02	4577.AC205471.4_FGP003	0	0	0	0.537	0.537
109621226	AC206165.3_FGP007	4577.GRMZM2G003489_P02	4577.AC206165.3_FGP007	0	0	0	0.537	0.537
109621226	GRMZM2G002131_P01	4577.GRMZM2G003489_P02	4577.GRMZM2G002131_P01	0	0	0	0.714	0.714
109621226	hsbp2	4577.GRMZM2G003489_P02	4577.GRMZM2G065355_P01	0	0.3	0	0.221	0.431
109621226	GRMZM2G179802_P02	4577.GRMZM2G003489_P02	4577.GRMZM2G179802_P02	0	0	0	0.456	0.456
109621226	GRMZM2G088242_P01	4577.GRMZM2G003489_P02	4577.GRMZM2G088242_P01	0	0	0	0.538	0.538
109621226	GRMZM2G105348_P01	4577.GRMZM2G003489_P02	4577.GRMZM2G105348_P01	0	0.048	0	0.597	0.599
109621226	GRMZM2G005815_P01	4577.GRMZM2G003489_P02	4577.GRMZM2G005815_P01	0	0	0	0.603	0.603
109621226	HSP82	4577.GRMZM2G003489_P02	4577.GRMZM5G833699_P01	0	0.329	0	0.539	0.677
109621226	GRMZM2G026742_P01	4577.GRMZM2G003489_P02	4577.GRMZM2G026742_P04	0	0	0	0.714	0.714
109621226	GRMZM2G118485_P02	4577.GRMZM2G003489_P02	4577.GRMZM2G118485_P02	0	0	0	0.714	0.714
109621226	GRMZM2G139535_P01	4577.GRMZM2G003489_P02	4577.GRMZM2G139535_P02	0	0	0	0.714	0.714
109621226	GRMZM2G173090_P02	4577.GRMZM2G003489_P02	4577.GRMZM2G173090_P01	0	0	0	0.797	0.797
109621226	GRMZM2G118453_P01	4577.GRMZM2G003489_P02	4577.GRMZM2G118453_P01	0	0	0	0.798	0.798
109621226	GRMZM2G059851_P01	4577.GRMZM2G003489_P02	4577.GRMZM2G059851_P01	0	0.049	0	0.798	0.799
109621226	tds925.54	4577.GRMZM2G003489_P02	4577.GRMZM2G070475_P01	0	0.179	0	0.797	0.826
109621226	GRMZM2G165272_P01	4577.GRMZM2G003489_P02	4577.GRMZM2G165272_P01	0	0	0	0.897	0.897
541780	GRMZM2G002131_P01	4577.GRMZM2G360681_P01	4577.GRMZM2G002131_P01	0	0	0	0.538	0.538
541780	GRMZM2G005815_P01	4577.GRMZM2G360681_P01	4577.GRMZM2G005815_P01	0	0	0	0.704	0.704
541780	732788	4577.GRMZM2G360681_P01	4577.GRMZM2G006745_P02	0	0	0	0.537	0.537
541780	GRMZM2G026742_P01	4577.GRMZM2G360681_P01	4577.GRMZM2G026742_P04	0	0	0	0.537	0.537
541780	MBF1.1	4577.GRMZM2G360681_P01	4577.GRMZM2G051135_P01	0	0	0	0.521	0.521
541780	GRMZM2G059851_P01	4577.GRMZM2G360681_P01	4577.GRMZM2G059851_P01	0	0	0	0.815	0.815
541780	hsbp2	4577.GRMZM2G360681_P01	4577.GRMZM2G065355_P01	0	0	0	0.435	0.435
541780	GRMZM2G098696_P01	4577.GRMZM2G360681_P01	4577.GRMZM2G098696_P02	0	0	0	0.44	0.44
541780	GRMZM2G115456_P01	4577.GRMZM2G360681_P01	4577.GRMZM2G115456_P01	0	0	0	0.497	0.497
541780	GRMZM2G118485_P02	4577.GRMZM2G360681_P01	4577.GRMZM2G118485_P02	0	0	0	0.537	0.537
541780	GRMZM2G139535_P01	4577.GRMZM2G360681_P01	4577.GRMZM2G139535_P02	0	0	0	0.538	0.538
541780	GRMZM2G164909_P01	4577.GRMZM2G360681_P01	4577.GRMZM2G164909_P01	0	0	0	0.44	0.44
541780	GRMZM2G165272_P01	4577.GRMZM2G360681_P01	4577.GRMZM2G165272_P01	0	0	0	0.44	0.44
541780	GRMZM2G173090_P02	4577.GRMZM2G360681_P01	4577.GRMZM2G173090_P01	0	0	0	0.704	0.704
541780	GRMZM2G179802_P02	4577.GRMZM2G360681_P01	4577.GRMZM2G179802_P02	0	0	0	0.548	0.548
541780	GRMZM2G301485_P01	4577.GRMZM2G360681_P01	4577.GRMZM2G301485_P01	0	0	0	0.541	0.541
541780	GRMZM2G384339_P01	4577.GRMZM2G360681_P01	4577.GRMZM2G384339_P01	0	0	0	0.497	0.497
732788	GRMZM2G002131_P01	4577.GRMZM2G006745_P02	4577.GRMZM2G002131_P01	0	0	0	0.538	0.538
732788	GRMZM2G005815_P01	4577.GRMZM2G006745_P02	4577.GRMZM2G005815_P01	0	0	0	0.535	0.535
732788	GRMZM2G026742_P01	4577.GRMZM2G006745_P02	4577.GRMZM2G026742_P04	0	0	0	0.431	0.43
732788	GRMZM2G115456_P01	4577.GRMZM2G006745_P02	4577.GRMZM2G115456_P01	0	0	0	0.431	0.43
732788	GRMZM2G118485_P02	4577.GRMZM2G006745_P02	4577.GRMZM2G118485_P02	0	0	0	0.431	0.43
732788	GRMZM2G384339_P01	4577.GRMZM2G006745_P02	4577.GRMZM2G384339_P01	0	0	0	0.431	0.43
732788	GRMZM2G125969_P01	4577.GRMZM2G006745_P02	4577.GRMZM2G125969_P01	0	0	0	0.5	0.499
732788	GRMZM2G173090_P02	4577.GRMZM2G006745_P02	4577.GRMZM2G173090_P01	0	0	0	0.535	0.535
732788	GRMZM2G179802_P02	4577.GRMZM2G006745_P02	4577.GRMZM2G179802_P02	0	0	0	0.535	0.535
732788	GRMZM2G139535_P01	4577.GRMZM2G006745_P02	4577.GRMZM2G139535_P02	0	0	0	0.538	0.538
732788	MBF1.1	4577.GRMZM2G006745_P02	4577.GRMZM2G051135_P01	0	0	0	0.552	0.552
732788	GRMZM2G010871_P01	4577.GRMZM2G006745_P02	4577.GRMZM2G010871_P02	0	0	0	0.586	0.586
732788	GRMZM2G132971_P01	4577.GRMZM2G006745_P02	4577.GRMZM2G132971_P01	0	0	0	0.586	0.586
732788	GRMZM2G165272_P01	4577.GRMZM2G006745_P02	4577.GRMZM2G165272_P01	0	0	0	0.586	0.586
732788	GRMZM2G059851_P01	4577.GRMZM2G006745_P02	4577.GRMZM2G059851_P01	0	0	0	0.936	0.936
AC205471.4_FGP003	HSP82	4577.AC205471.4_FGP003	4577.GRMZM5G833699_P01	0	0.329	0	0.18	0.426
AC205471.4_FGP003	hsbp2	4577.AC205471.4_FGP003	4577.GRMZM2G065355_P01	0	0.3	0	0.221	0.431
AC206165.3_FGP007	HSP82	4577.AC206165.3_FGP007	4577.GRMZM5G833699_P01	0	0.329	0	0.18	0.426
AC206165.3_FGP007	hsbp2	4577.AC206165.3_FGP007	4577.GRMZM2G065355_P01	0	0.3	0	0.221	0.431
GRMZM2G002131_P01	hsbp2	4577.GRMZM2G002131_P01	4577.GRMZM2G065355_P01	0	0.3	0	0.221	0.431
GRMZM2G002131_P01	HSP82	4577.GRMZM2G002131_P01	4577.GRMZM5G833699_P01	0	0.329	0	0.336	0.535
GRMZM2G002131_P01	MBF1.1	4577.GRMZM2G002131_P01	4577.GRMZM2G051135_P01	0	0	0	0.586	0.586
GRMZM2G005815_P01	GRMZM2G026742_P01	4577.GRMZM2G005815_P01	4577.GRMZM2G026742_P04	0.768	0.319	0	0.537	0.4
GRMZM2G005815_P01	GRMZM2G118485_P02	4577.GRMZM2G005815_P01	4577.GRMZM2G118485_P02	0.766	0.319	0	0.537	0.401
GRMZM2G005815_P01	GRMZM2G384339_P01	4577.GRMZM2G005815_P01	4577.GRMZM2G384339_P01	0.759	0.319	0	0.537	0.403
GRMZM2G005815_P01	GRMZM2G115456_P01	4577.GRMZM2G005815_P01	4577.GRMZM2G115456_P01	0.75	0.319	0	0.537	0.407
GRMZM2G005815_P01	MBF1.1	4577.GRMZM2G005815_P01	4577.GRMZM2G051135_P01	0	0	0	0.713	0.713
GRMZM2G005815_P01	SUMO1a	4577.GRMZM2G005815_P01	4577.GRMZM2G053898_P02	0	0.678	0	0.196	0.73
GRMZM2G005815_P01	hsbp2	4577.GRMZM2G005815_P01	4577.GRMZM2G065355_P01	0	0.752	0	0.459	0.86
GRMZM2G005815_P01	HSP82	4577.GRMZM2G005815_P01	4577.GRMZM5G833699_P01	0	0.747	0	0.545	0.879
GRMZM2G010871_P01	HSP82	4577.GRMZM2G010871_P02	4577.GRMZM5G833699_P01	0	0.329	0	0.18	0.426
GRMZM2G010871_P01	hsbp2	4577.GRMZM2G010871_P02	4577.GRMZM2G065355_P01	0	0.3	0	0.221	0.431
GRMZM2G026742_P01	MBF1.1	4577.GRMZM2G026742_P04	4577.GRMZM2G051135_P01	0	0	0	0.511	0.511
GRMZM2G026742_P01	HSP82	4577.GRMZM2G026742_P04	4577.GRMZM5G833699_P01	0	0.329	0	0.401	0.58
GRMZM2G026742_P01	hsbp2	4577.GRMZM2G026742_P04	4577.GRMZM2G065355_P01	0	0.55	0	0.312	0.677
GRMZM2G059851_P01	MBF1.1	4577.GRMZM2G059851_P01	4577.GRMZM2G051135_P01	0	0	0	0.762	0.762
GRMZM2G059851_P01	hsbp2	4577.GRMZM2G059851_P01	4577.GRMZM2G065355_P01	0	0.3	0	0.221	0.431
GRMZM2G059851_P01	tds925.54	4577.GRMZM2G059851_P01	4577.GRMZM2G070475_P01	0	0.179	0	0.5	0.571
GRMZM2G059851_P01	HSP82	4577.GRMZM2G059851_P01	4577.GRMZM5G833699_P01	0	0.329	0	0.526	0.668
GRMZM2G086880_P01	hsbp2	4577.GRMZM2G086880_P01	4577.GRMZM2G065355_P01	0	0.3	0	0.221	0.431
GRMZM2G086880_P01	HSP82	4577.GRMZM2G086880_P01	4577.GRMZM5G833699_P01	0	0.329	0	0.18	0.426
GRMZM2G088242_P01	hsbp2	4577.GRMZM2G088242_P01	4577.GRMZM2G065355_P01	0	0.3	0	0.221	0.431
GRMZM2G088242_P01	HSP82	4577.GRMZM2G088242_P01	4577.GRMZM5G833699_P01	0	0.329	0	0.18	0.426
GRMZM2G089525_P01	hsbp2	4577.GRMZM2G089525_P01	4577.GRMZM2G065355_P01	0	0.3	0	0.221	0.431
GRMZM2G089525_P01	HSP82	4577.GRMZM2G089525_P01	4577.GRMZM5G833699_P01	0	0.329	0	0.18	0.426
GRMZM2G098696_P01	MBF1.1	4577.GRMZM2G098696_P02	4577.GRMZM2G051135_P01	0	0	0	0.51	0.51
GRMZM2G098696_P01	hsbp2	4577.GRMZM2G098696_P02	4577.GRMZM2G065355_P01	0	0.3	0	0.221	0.431
GRMZM2G098696_P01	tds925.54	4577.GRMZM2G098696_P02	4577.GRMZM2G070475_P01	0	0.179	0	0.348	0.441
GRMZM2G098696_P01	HSP82	4577.GRMZM2G098696_P02	4577.GRMZM5G833699_P01	0	0.329	0	0.384	0.568
GRMZM2G105348_P01	hsbp2	4577.GRMZM2G105348_P01	4577.GRMZM2G065355_P01	0	0.3	0	0.221	0.431
GRMZM2G105348_P01	HSP82	4577.GRMZM2G105348_P01	4577.GRMZM5G833699_P01	0	0.329	0	0.18	0.426
GRMZM2G115456_P01	MBF1.1	4577.GRMZM2G115456_P01	4577.GRMZM2G051135_P01	0	0	0	0.511	0.511
GRMZM2G115456_P01	hsbp2	4577.GRMZM2G115456_P01	4577.GRMZM2G065355_P01	0	0.55	0	0.312	0.677
GRMZM2G115456_P01	HSP82	4577.GRMZM2G115456_P01	4577.GRMZM5G833699_P01	0	0.329	0	0.401	0.58
GRMZM2G118453_P01	hsbp2	4577.GRMZM2G118453_P01	4577.GRMZM2G065355_P01	0	0.3	0	0.221	0.431
GRMZM2G118453_P01	HSP82	4577.GRMZM2G118453_P01	4577.GRMZM5G833699_P01	0	0.329	0	0.18	0.426
GRMZM2G118485_P02	MBF1.1	4577.GRMZM2G118485_P02	4577.GRMZM2G051135_P01	0	0	0	0.511	0.511
GRMZM2G118485_P02	hsbp2	4577.GRMZM2G118485_P02	4577.GRMZM2G065355_P01	0	0.55	0	0.312	0.677
GRMZM2G118485_P02	HSP82	4577.GRMZM2G118485_P02	4577.GRMZM5G833699_P01	0	0.329	0	0.401	0.58
GRMZM2G125969_P01	hsbp2	4577.GRMZM2G125969_P01	4577.GRMZM2G065355_P01	0	0.3	0	0.221	0.431
GRMZM2G125969_P01	HSP82	4577.GRMZM2G125969_P01	4577.GRMZM5G833699_P01	0	0.329	0	0.18	0.426
GRMZM2G132971_P01	hsbp2	4577.GRMZM2G132971_P01	4577.GRMZM2G065355_P01	0	0.3	0	0.221	0.431
GRMZM2G132971_P01	HSP82	4577.GRMZM2G132971_P01	4577.GRMZM5G833699_P01	0	0.329	0	0.18	0.426
GRMZM2G139535_P01	MBF1.1	4577.GRMZM2G139535_P02	4577.GRMZM2G051135_P01	0	0	0	0.586	0.586
GRMZM2G139535_P01	hsbp2	4577.GRMZM2G139535_P02	4577.GRMZM2G065355_P01	0	0.3	0	0.221	0.431
GRMZM2G139535_P01	HSP82	4577.GRMZM2G139535_P02	4577.GRMZM5G833699_P01	0	0.329	0	0.336	0.535
GRMZM2G164909_P01	MBF1.1	4577.GRMZM2G164909_P01	4577.GRMZM2G051135_P01	0	0	0	0.51	0.51
GRMZM2G164909_P01	hsbp2	4577.GRMZM2G164909_P01	4577.GRMZM2G065355_P01	0	0.3	0	0.221	0.431
GRMZM2G164909_P01	tds925.54	4577.GRMZM2G164909_P01	4577.GRMZM2G070475_P01	0	0.179	0	0.348	0.441
GRMZM2G164909_P01	HSP82	4577.GRMZM2G164909_P01	4577.GRMZM5G833699_P01	0	0.329	0	0.384	0.568
GRMZM2G165272_P01	MBF1.1	4577.GRMZM2G165272_P01	4577.GRMZM2G051135_P01	0	0	0	0.51	0.51
GRMZM2G165272_P01	hsbp2	4577.GRMZM2G165272_P01	4577.GRMZM2G065355_P01	0	0.3	0	0.221	0.431
GRMZM2G165272_P01	tds925.54	4577.GRMZM2G165272_P01	4577.GRMZM2G070475_P01	0	0.179	0	0.797	0.826
GRMZM2G165272_P01	HSP82	4577.GRMZM2G165272_P01	4577.GRMZM5G833699_P01	0	0.329	0	0.539	0.677
GRMZM2G165972_P02	hsbp2	4577.GRMZM2G165972_P02	4577.GRMZM2G065355_P01	0	0.3	0	0.221	0.431
GRMZM2G165972_P02	HSP82	4577.GRMZM2G165972_P02	4577.GRMZM5G833699_P01	0	0.329	0	0.18	0.426
GRMZM2G173090_P02	MBF1.1	4577.GRMZM2G173090_P01	4577.GRMZM2G051135_P01	0	0	0	0.713	0.713
GRMZM2G173090_P02	SUMO1a	4577.GRMZM2G173090_P01	4577.GRMZM2G053898_P02	0	0.678	0	0.196	0.73
GRMZM2G173090_P02	hsbp2	4577.GRMZM2G173090_P01	4577.GRMZM2G065355_P01	0	0.752	0	0.459	0.86
GRMZM2G173090_P02	HSP82	4577.GRMZM2G173090_P01	4577.GRMZM5G833699_P01	0	0.747	0	0.545	0.879
GRMZM2G179802_P02	hsbp2	4577.GRMZM2G179802_P02	4577.GRMZM2G065355_P01	0	0.3	0	0.221	0.431
GRMZM2G179802_P02	HSP82	4577.GRMZM2G179802_P02	4577.GRMZM5G833699_P01	0	0.329	0	0.34	0.538
GRMZM2G301485_P01	MBF1.1	4577.GRMZM2G301485_P01	4577.GRMZM2G051135_P01	0	0	0	0.51	0.51
GRMZM2G301485_P01	hsbp2	4577.GRMZM2G301485_P01	4577.GRMZM2G065355_P01	0	0.3	0	0.221	0.431
GRMZM2G301485_P01	tds925.54	4577.GRMZM2G301485_P01	4577.GRMZM2G070475_P01	0	0.179	0	0.348	0.441
GRMZM2G301485_P01	HSP82	4577.GRMZM2G301485_P01	4577.GRMZM5G833699_P01	0	0.329	0	0.384	0.568
GRMZM2G384339_P01	MBF1.1	4577.GRMZM2G384339_P01	4577.GRMZM2G051135_P01	0	0	0	0.511	0.511
GRMZM2G384339_P01	hsbp2	4577.GRMZM2G384339_P01	4577.GRMZM2G065355_P01	0	0.55	0	0.312	0.677
GRMZM2G384339_P01	HSP82	4577.GRMZM2G384339_P01	4577.GRMZM5G833699_P01	0	0.329	0	0.401	0.58
HSP82	tds925.54	4577.GRMZM5G833699_P01	4577.GRMZM2G070475_P01	0	0.152	0	0.8	0.823
